# Supplementary material for: Brain-specific Drp1 regulates postsynaptic endocytosis and dendrite formation independently of mitochondrial division
Source: eLife. 2019 Oct 11;8:e44739. doi: 10.7554/eLife.44739 (PMC6824841; doi:10.7554/eLife.44739)
Supplement: Figure 1—source data 1. [file elife-44739-fig1-data1.xlsx]

## Sheet: Fig1
Figure 1F
Relative intensity of tdTomato and HA-Drp1 in dendritic shafts and spines
HA-Drp1ABCD + tdTomato neuron				HA-Drp1BCD + tdTomato neuron
Distance (µm)	HA-Drp1ABCD	tdTomato		Distance (µm)	HA-Drp1BCD	tdTomato
0	0.0162898	0.0230587		0	0.0918093	0.123175
0.06252	0.0196835	0.0230587		0.06252	0.0964535	0.17906
0.12503	0.0312222	0.0255178		0.12503	0.136257	0.266026
0.18755	0.054837	0.0312771		0.18755	0.186111	0.385363
0.25007	0.0857198	0.08949		0.25007	0.242174	0.510885
0.31258	0.144389	0.185182		0.31258	0.274369	0.601073
0.3751	0.251093	0.297087		0.3751	0.322489	0.648591
0.43762	0.41836	0.43152		0.43762	0.396333	0.682697
0.50014	0.550079	0.574083		0.50014	0.470895	0.714179
0.56265	0.602752	0.702004		0.56265	0.492888	0.749242
0.62517	0.568178	0.781548		0.62517	0.500438	0.773844
0.68769	0.534765	0.850725		0.68769	0.508995	0.810059
0.7502	0.611109	0.919415		0.7502	0.56604	0.871311
0.81272	0.722592	0.9757		0.81272	0.592566	0.924563
0.87524	0.869017	1		0.87524	0.654988	0.957392
0.93775	0.908143	0.989213		0.93775	0.705852	0.957378
1.00027	0.902883	0.949939		1.00027	0.776858	0.961171
1.06279	0.819878	0.890243		1.06279	0.808088	0.983477
1.12531	0.762822	0.858944		1.12531	0.81139	0.996044
1.18782	0.788699	0.852033		1.18782	0.79508	1
1.25034	0.917971	0.868845		1.25034	0.76994	0.971262
1.31286	1	0.878879		1.31286	0.780746	0.951608
1.37537	0.926272	0.851766		1.37537	0.862318	0.933432
1.43789	0.72156	0.807421		1.43789	0.947132	0.9388
1.50041	0.495412	0.741478		1.50041	0.983788	0.937258
1.56292	0.347955	0.684793		1.56292	0.995846	0.893623
1.62544	0.285808	0.623524		1.62544	1	0.823618
1.68796	0.30559	0.573817		1.68796	0.991808	0.736685
1.75048	0.331552	0.517		1.75048	0.917068	0.664354
1.81299	0.31908	0.448797		1.81299	0.746812	0.582932
1.87551	0.25993	0.395635		1.87551	0.549199	0.509254
1.93803	0.230447	0.368456		1.93803	0.363172	0.442835
2.00054	0.240204	0.377915		2.00054	0.250824	0.396779
2.06306	0.285284	0.416745		2.06306	0.196819	0.380063
2.12558	0.341238	0.468113		2.12558	0.184264	0.393348
2.18809	0.397743	0.528275		2.18809	0.214877	0.443437
2.25061	0.425572	0.567859		2.25061	0.245309	0.501386
2.31313	0.439868	0.599092		2.31313	0.253684	0.558944
2.37564	0.439246	0.635597		2.37564	0.235061	0.6017
2.43816	0.544267	0.627512		2.43816	0.230811	0.623757
2.50068	0.69813	0.569166		2.50068	0.233502	0.616369
2.5632	0.800224	0.439252		2.5632	0.239836	0.555919
2.62571	0.75103	0.303711		2.62571	0.226712	0.455408
2.68823	0.541255	0.18795		2.68823	0.192694	0.343225
2.75075	0.323379	0.102115		2.75075	0.143988	0.233183
2.81326	0.146651	0.0539148		2.81326	0.0946444	0.139869
2.87578	0.0579478	0.0309224		2.87578	0.0527865	0.0711825
Figure 1G
Ratio of signal Intensity in spines relative to those in dendritic shafts
	tdTomato signal			HA-Drp1 signal
Neurons:	HA-ABCD	HA-BCD	Neurons:	HA-ABCD	HA-BCD
	0.468586	0.783943		0.238245	0.351293
	0.442767	0.813459		0.364583	0.34806
	0.527419	0.677033		0.436137	0.349537
	0.506667	0.320574		0.277429	0.130787
	0.340524	1.07753		0.101643	0.311688
	0.483395	0.842491		0.390821	0.434783
	0.266497	0.730769		0.313808	0.178261
	0.505865	0.466667		0.409639	0.160714
	0.48	0.825		0.343808	0.139881
	0.372283	0.433498		0.922535	0.239837
	0.918495	0.434146		0.945455	0.135501
	1.06528	0.680315		0.583423	0.358634
	0.951515	0.365354		0.617544	0.210626
	0.682657	0.688442		1	0.298172
	0.885714	0.459357		0.640506	0.386905
	0.663609	0.764706		0.504303	0.177215
	1.31136	0.939148		0.91498	0.372152
	0.677656	0.973684		0.597166	0.615142
	0.638298	0.287109		0.315108	0.175141
	0.657837	1.10352		0.439222	0.330508
	0.870892	0.546755		0.404133	0.372327
	0.757098	0.653465		0.884434	0.361006
	0.548889	0.227027		0.318352	0.293227
	0.884444	0.656757		0.820225	0.315538
	0.838235	0.607353		0.52381	0.306349
	0.760465	0.730882		0.337539	0.294444
	0.455814	0.705333		0.300736	0.479584
	0.524476	0.56		0.622407	0.185598
	0.517094	0.594406		0.534128	0.386935
	1.50558	0.637762		0.686298	0.204594
	0.883495	0.989231		1.20277	0.537684
	1	0.590769		1.30415	0.216912
	0.665966	0.774648		0.380124	0.289474
	0.772727	0.589984		0.696252	0.171992
	0.50566	0.735593		0.646605	0.308276
	0.625293	1.00678		0.424581	0.46069
	0.515222	0.832853		0.356145	0.562061
	0.70977	1.00865		0.649505	0.492584
	0.603448	0.703966		0.465347	0.365714
	0.490521	0.587828		0.246279	0.410116
	0.521327	0.532438		0.470907	0.213626
	0.986111	0.4393		1.02222	0.114875
	0.742647	0.473404		0.412676	0.206211
	0.840686	0.301946		0.823944	0.202002
	0.50939	0.296498		0.528455	0.245678
	0.539256	0.36109		0.508621	0.200495
	0.38843	0.457229		0.317529	0.360149
	0.663462	0.311264		0.742952	0.171875
	0.675676	0.33362		0.791304	0.404167
	0.828704	0.409903		0.413428	0.257778
	0.646897	0.850148		0.375706	0.270694
	0.595368	0.736552		0.514861	0.299225
	0.531169	0.48		0.565714	0.139535
	0.70649	0.683989		0.465638	0.148587
	0.317536	0.521739		0.60087	0.071875
	0.709091	0.544622		1.20551	0.300781
	0.680303	0.608472		1.06422	0.320644
	0.322165	0.51715		0.198675	0.143965
	0.554124	0.604222		0.738411	0.217054
	0.420051	0.574048		0.379722	0.265161
	0.41403	0.54725		0.468915	0.249703
	0.619697	0.631134		0.521688	0.338498
	0.658974	0.53322		0.508539	0.32766
	0.6	0.356241		0.734345	0.134078
	0.687151	0.44732		0.388889	0.318977
	0.44	0.233474		0.998523	0.081633
	0.517663	0.532836		1.0382	0.276316
	0.812395	0.595522		0.897619	0.220096
	0.743719	0.578244		1.56191	0.495
	0.492877	0.735		1.01173	0.348004
	0.889989	0.360269		0.378593	0.398169
	0.707317	0.495575		0.452356	0.260185
	0.877817	0.534722		0.545557	0.293522
	0.749695	0.366667		0.730892	0.410931
	0.893318	0.706845		0.736025	0.435306
	0.787815	0.431062		0.732852	0.165453
	0.658613	0.26281		0.565584	0.214851
	0.585366	0.813223		0.583591	0.817822
	0.80568	0.424132		0.452055	0.310476
	0.761989	0.595978		0.865263	0.441905
	0.468856	0.833652		0.414493	0.33887
	0.233296	0.66348		0.646377	1.10963
	0.357534	0.470405		0.300242	0.204885
	0.261644	0.649533		0.266344	0.31886
	0.535637	0.719745		0.477558	0.615772
	0.364351	0.867176		0.339019	0.276843
	0.483617	0.203053		0.443497	1.21604
	0.48294	0.626263		0.599634	0.240602
	0.573152	1.15098		0.439545	0.752108
	0.495601	0.565354		0.470339	0.256647
	0.461806	0.6399		0.391089	0.303371
	0.333333	0.587202		0.285149	0.201445
	0.522255	0.437255		0.287778	0.743363
	0.391691	0.422549		0.271111	0.658407
	0.445194	0.41002		0.240868	0.386881
	0.671164	0.350716		0.3379	0.491299
	0.458394	0.41169		0.410053	0.332792
	0.397163	0.340369		0.296089	0.307353
	0.238318	0.583113		0.558659	0.314706
	0.47947	0.651206		0.716279	0.355844
	0.756993	1.35918		0.925373	0.546784
	0.76049	0.624242		0.641791	0.259714
	0.938326	0.405405		0.407572	0.15
	0.77533	1.01091		0.35412	0.784091
	0.685504	0.745		0.382263	0.292308
	1.08108	0.843299		1.00612	0.695946
	0.301455	0.645455		0.443503	0.489396
	0.575884	0.699219		0.175141	0.378151
	1.30263	0.9329		2.24817	0.256569
	0.324561	0.536797		0.861314	0.253478
	1.00697	1.03136		1.33044	0.330572
	0.878788	1.04878		0.957854	0.522784
	1.39437	0.623269		1.21762	0.479228
	1.4169	0.698163		1.06218	0.423628
	0.937209	0.632546		1.31278	0.682415
	1.0075	0.448598		1.51366	0.286339
	0.7925	0.810458		1.26776	0.330049
	0.622108	0.490196		1.0307	0.308703
	0.581897	0.590258		0.384375	0.311983
	0.715013	0.475645		1.25532	0.257231
	0.469697	0.387755		2.48558	0.344164
	0.511811	0.25102		1.28241	0.247894
	0.627119	0.303769		0.487663	0.270588
	0.493711	0.288248		1.19636	0.294118
	1.7	0.563725		0.930108	0.305505
	0.924092	0.316176		1.82456	0.148624
	0.30363	0.549793		0.856725	0.207229
	0.605863	0.573529		0.952381	0.314748
	0.677143	0.7296		0.576577	0.198356
	0.975138	0.930759		2.03857	0.465116
	0.48895	0.377399		0.606061	0.433276
	0.453488	0.33427		0.521401	0.342623
	0.304094	0.533708		0.579245	0.596721
	0.46789	0.39619		0.677885	0.168874
	0.25	0.565714		0.607029	0.576159
	0.969773	0.86836		1.29395	0.520134
	0.27204	0.493304		0.746398	0.276841
	1.21565	0.915179		1.30635	0.381544
	0.351974	0.355783		0.610329	0.354452
	0.442748	0.572474		0.538752	0.362158
	0.608696	0.745734		0.367041	0.309849
	1.45714	1.09067		0.55988	0.340686
	0.493506	1.10933		0.446108	0.637255
	0.813158	0.672913		0.843648	0.581028
	0.873684	0.659284		0.589577	0.847826
	0.838384	0.466448		1.16907	0.318216
	0.673401	0.619469		0.402878	0.648598
	0.616205	0.392344		1.20079	0.179348
	0.605544	0.342903		0.69685	0.354814
	0.333813	0.462158		0.489474	0.348123
	0.719424	0.660225		0.747368	0.542662
	0.599388	0.677936		0.696751	0.931461
	0.323108	1		0.470405	0.478652
	0.613497	0.862385		0.800623	0.673937
	0.777996	0.359036		0.358452	0.263542
	0.968059	0.296386		1.21951	0.58125
	0.936709	0.366617		1.01081	0.462646
	0.476965	0.193741		0.579487	0.363636
	0.319936	0.409836		0.599483	0.470748
	0.838828	0.73716		0.651639	0.705623
	0.382927	0.746224		0.715503	0.331863
	0.317073	0.684971		0.555366	0.869984
	0.761278	0.517341		0.675958	0.776886
	0.336466			0.970964
	0.376532			0.78
	0.7254			1.0131
	0.309353			0.394216
	0.484108			1.46438
	0.845966			2.39842
	0.633053			1.054
	0.543417			0.768898
	0.426593			0.463918
	0.498615			0.608247
	0.46723			0.812109
	0.382664			0.45929
	1			1
Figure 1J
Band intensity of the indicated antibodies in the PSD fraction relative to the whole brain
Antibodies:	pan-Drp1	AB
	0.333802	0.838995
	0.450232	1.36154
	0.345975	0.687074
