# Supplementary material for: Brain-specific Drp1 regulates postsynaptic endocytosis and dendrite formation independently of mitochondrial division
Source: eLife. 2019 Oct 11;8:e44739. doi: 10.7554/eLife.44739 (PMC6824841; doi:10.7554/eLife.44739)
Supplement: Figure 2—figure supplement 1—source data 1. [file elife-44739-fig2-figsupp1-data1.xlsx]

## Sheet: Fig2-S1
Figure 2—figure supplement 1B					Figure 2—figure supplement 1C
Mitochondrial length (µm) in proximal region					Mitochondrial length (µm) in distal region
Dynasore:	-	+			Dynasore:	-	+
	6.226	17.037				0.839	13.236
	9.487	1.377				0.93	16.636
	6.375	12.775				1.364	35.671
	2.371	11.243				1.002	2.395
	15.464	6.041				0.915	0.896
	11.968	3.254				0.896	0.606
	0.312	1.132				1.029	3.42
	0.172	0.789				1.299	1.529
	0.224	1.534				2.663	0.744
	0.235	1.474				1.081	0.506
	0.618	5.268				0.533	0.526
	0.566	2.01				0.606	2.132
	0.629	2.01				0.949	0.93
	1.424	2.815				0.706	1.334
	1.398	5.06				0.588	3.669
	0.803	9.484				3.21	0.744
	0.671	4.447				0.767	1.259
	1.789	7.211				1.615	0.785
	1.414	0.789				1.291	1.921
	0.744	1.354				3.573	0.582
	1.177	0.767				1.672	0.424
	0.212	0.716				1.5	1.547
	0.416	0.6				1.27	1.176
	0.448	0.364				2.653	0.686
	0.279	4.991				0.448	3.166
	0.808	1.065				0.499	1.377
	0.75	0.558				0.9	0.716
	1.248	7.443				1.211	1.273
	1.305	8.394				1.116	1.737
	0.765	5.484				1.354	0.711
	0.817	1.299				0.634	3.499
	1.86	2.289				0.533	1.455
	0.672	0.485				1.715	0.716
	1.069	0.353				0.582	0.856
	1.04	0.485				0.949	1.176
	1.624	0.634				1.997	2.906
	0.711	0.671				1.589	0.448
	0.541	0.93				1.534	0.998
	1.415	1.481				1.081	0.819
	0.579	0.65				0.526	0.485
	1.403	0.263				1.11	2.846
	1.04	0.65				0.558	1.607
	0.848	2.765				1.002	1.081
	1.334	0.832				0.884	1.029
	0.335	2.1				0.506	0.753
	0.418	3.463				0.506	1.294
	1.006	1.83				2.418	0.666
	1.306	1.942				1.299	0.789
	0.25	4.777				1.385	0.424
	1.006	5.544				1.237	0.753
	0.671	2				1.713	0.558
	0.448	0.856				0.949	0.506
	0.374	0.919				3.744	0.448
	0.355	3.028				2.188	2.83
	1.19	1.847				4.405	0.671
	1.251	0.869				0.949	0.671
	1.213	0.767				0.832	0.767
	0.782	4.252				0.749	0.506
	0.741	7.931				0.485	1.474
	0.442	4.236				0.448	0.416
	0.383	2.482				0.6	0.416
	0.635	1.081				0.588	0.711
	1.339	0.634				3.005	2.121
	1.085	1.315				12.075	3.271
	0.658	1.191				4.239	0.744
	3.459	2.353				4.178	1.299
	0.629	2.979				2.91	1.005
	2.637	0.856				3.299	1.159
	0.711	0.848				3.028	0.93
	0.992	0.558				10.424	0.526
	0.448	1.5				4.323	0.836
	1.183	0.767				11.631	0.671
	0.689	1.059				4.116	1.921
	0.465	2.447				2.796	1.052
	0.591	2.354				2.169	0.949
	1.656	2.859				1.817	0.606
	4.413	4.346				0.949	1.607
	1.063	0.869				0.65	1.002
	1.514	0.767				0.869	1.731
	0.501	0.416				3.867	1.769
	0.728	0.186				3.412	5.294
	1.081	0.416				6.078	9.67
	0.647	0.343				1.674	1.417
	0.774	1.372				1.455	2.757
	2.088	0.716				0.558	1.299
	1.541	0.856				1.554	3.271
	1.493	0.448				1.765	1.817
	1.082	0.448				0.526	0.785
	3.133	0.706				0.767	0.848
	2.464	0.711				2.289	0.785
	0.614	0.711				0.558	1.081
	0.383	2.003				1.364	0.634
	0.881	2.343				0.919	0.416
	0.506	0.3				1.529	1.237
	0.898	0.836				1.897	1.002
	1.796	0.448				0.582	0.819
	0.858	0.485				0.9	0.416
	1.622	0.416				0.896	0.789
	1.192	0.416				2.769	0.526
	4.007	0.6				1.116	1.869
	6.838	13.059				3.554	6.377
	1.5	8.121				1.472	15.6
	3.673	1.042				3.694	8.606
	2.6	0.558				0.819	12.005
	5.331	2.795				1.841	14.59
	11.83	2.384				7.341	4.405
	1.554	2.158				1.372	1
	0.848	1.869				1.116	1.44
	0.824	2.139				7.261	2.052
	0.448	0.789				1.414	0.515
	0.6	2.295				2.003	0.38
	0.424	2.458				2.121	0.876
	0.506	5.901				2.413	0.575
	0.424	0.767				2.248	3.995
	0.166	2.196				3.354	0.969
	0.671	0.25				2.196	0.336
	0.416	0.279				5.322	0.799
	1.065	0.419				6.504	4.395
	1.065	0.454				7.524	2.092
	1.715	1.077				1.589	0.589
	1.453	0.25				0.588	0.503
	2.343	0.869				4.398	0.869
	1.27	8.818				1.302	0.537
	2.916	1.674				6.029	1.106
	0.634	3.6				11.86	2.428
	0.819	1.877				3.462	1.286
	1.972	0.882				17.626	2.458
	2.482	0.25				2.658	0.627
	1.422	0.537				1.882	0.45
	1.615	0.936				0.448	0.882
	0.789	3.744				0.533	1.872
	2.897	2.679				0.767	1.106
	1.385	1.092				2.6	1.066
	0.884	0.56				2.604	0.706
	1.291	0.651				4.315	1.006
	3.118	0.355				3.584	0.73
	1.354	0.243				1.913	1.123
	0.582	0.474				0.749	0.614
	1.86	0.392				3.254	1.231
	0.819	2.328				1.481	0.454
	0.558	0.428				0.506	1.145
	7.892	0.458				1.651	1.822
	2.473	0.212				0.711	0.4
	2.401	0.711				1.472	0.562
	2.969	0.596				0.485	1.674
	2.53	0.325				0.471	0.672
	2.503	1.364				1.259	2.44
	0.3	3.676				2.382	0.876
	0.372	0.282				1.841	1.322
	1.344	0.221				2.969	0.936
	2.024	0.221				0.869	0.698
	0.974	1.569				1.518	0.475
	2.902	1.718				2.003	0.876
	7.445	0.851				0.974	3.027
	3.736	1.578				1.412	0.772
	2.425	0.857				4.864	0.614
	3.118	0.268				0.856	0.614
	0.416	0.282				0.424	1.059
	2.184	1.521				0.526	1.895
	3.767	0.599				0.353	1.998
	6.822	0.25				0.6	1.187
	1.176	0.337				0.506	0.799
	0.744	1.395				2.606	5.25
	0.819	0.309				1.002	0.689
	0.789	0.533				0.606	0.575
	2.085	0.441				0.416	0.503
	1.015	1.282				2.599	1.192
	1.755	2.203				3.593	3.05
	1.825	0.755				1.248	1.147
	1.417	0.918				1.156	2.349
	1.052	2.099				1.116	0.499
	1.682	1.668				0.998	2.735
	1.684	2.716				1.085	0.762
	4.18	1.39				1.481	1.249
	1.081	2.241				3.572	0.928
	2.54	1.03				1.6	2.959
	1.615	0.691				7.947	0.627
	2.902	0.693				4.145	0.754
	6.955	0.812				1.248	0.971
	2.913	1.155				0.93	1.374
	1.344	0.469				1.414	1.192
	1.529	0.662				2.024	2.271
	1.529	1.127				3.471	1.519
	0.582	2.186				4.145	1.686
	1.211	2.683				2.833	1.633
	1.119	0.307				2.473	1.571
	2.612	0.19				1.869	1.061
	0.671	0.307				1.156	1.689
	3.547	0.684				2.78	2.136
	0.533	3.103				5.226	0.589
	0.634	1.395				1.291	3.602
	0.533	2.136				0.974	0.969
	0.789	2.717				0.533	1.599
	0.416	5.962				2.196	2.372
	0.448	1.415				7.13	0.364
	0.506	2.785				2.612	0.38
	0.424	0.552				0.832	2.372
	1.259	0.416				0.753	1.243
	1.354	0.75				0.753	0.686
	13.527	0.851				2.368	0.533
	6.212	11.076				1.005	9.949
	1.8	18.435				1.997	6.141
	4.677	5.068				0.744	19.091
	15.396	11.083				1.763	1.8
	9.177	1.302				2.066	1.769
	3.313	1.176				1.481	4.409
	2.301	1.012				3.371	5.126
	0.856	0.706				1.354	4.859
	2.046	2.169				0.744	4.323
	4.207	0.711				1.377	2.725
	3.932	0.915				2.777	0.487
	3.059	8.06				1.841	0.515
	0.634	1.86				1.132	1.535
	0.471	4.393				1.755	0.975
	1.005	11.943				1.085	0.751
	1.897	14.574				0.671	0.675
	1.769	13.434				0.869	0.987
	5.479	1.684				2.329	2.044
	2.6	3.069				4.118	4.815
	2.046	4.184				2.606	1.87
	1.882	4.249				1.085	4.885
	2.177	1.344				6.414	3.181
	1.684	3.24				7.664	6.792
	5.417	2.301				1.869	1.902
	3.752	0.666				4.317	1.905
	5.608	2.584				3.237	2.289
	3.503	1.156				3.498	1.734
	3.274	0.819				1.615	0.454
	0.606	1.877				3.942	2.132
	0.686	0.819				6.183	0.499
	0.711	1.554				3.81	0.751
	1.315	3.817				1.267	1.111
	1.474	1.453				1.664	0.762
	3.946	0.537				0.6	1.125
	15.413	0.454				2.196	1.457
	1.949	2.932				2.679	1.15
	2.897	0.636				0.856	1.713
	2.026	0.928				0.416	0.197
	3.087	1.686				1.792	0.279
	2.012	1.326				1.211	1.231
	1.997	0.811				3.096	2.565
	2.667	4.604				0.856	0.887
	3.529	2.79				2.014	2.534
	0.998	2.951				4.851	1.788
	1.248	3.254				1.529	1.199
	3.963	1.855				0.671	2.595
	0.848	0.614				1.639	1.2
	0.235	0.318				0.785	1.147
	0.856	1.757				0.686	2.613
	2.663	1.286				0.884	1.488
	1.273	1.935				0.506	2.821
	2.912	0.537				0.848	0.711
	0.671	1.066				4.028	0.728
	12.268	1.111				1.796	0.374
	0.869	1.56				1.715	0.454
	2.922	4.002				1.248	1.855
	1.085	0.728				0.558	0.882
	2.777	0.487				1.901	1.263
	1.165	10.47				0.582	2.644
	0.915	5.252				0.448	0.887
	3.714	1.35				1.755	0.395
	4.606	0.618				2.754	3.413
	3.789	0.565				1.424	0.575
	5.491	5.612				1.176	0.672
	2.232	1.147				0.533	0.454
	0.919	0.882				0.6	1.775
	0.767	0.45				0.526	1.016
	1.176	0.257				2.003	0.624
	1.424	2.935				2.121	0.515
	4.199	0.475				2.75	0.38
	2.169	1.023				0.25	0.813
	4.472	1.248				0.666	0.38
	2.765	0.395				1.497	0.441
	1.682	2.25				3.024	1.091
	1.191	1.326				2.824	3.724
	1.377	0.533				0.882	1.192
	1.291	0.537				0.503	0.936
	7.293	5.167				1.256	1.125
	2.121	3.12				0.672	0.728
	3.162	0.928				1.059	0.503
	4.059	1.231				0.312	1.426
	1.897	6.102				1.125	3.304
	0.416	1.116				0.799	0.813
	0.448	0.663				0.837	1.029
	0.333	1.973				0.672	0.257
	0.767	0.589				2.119	0.475
	1.065	0.537				0.515	1.262
	1.259	0.4				1.016	0.624
	2.1	0.353				1.2	0.921
	0.767	0.759				1.87	1.748
	0.533	0.4				1.378	4.024
	0.499	0.503				0.751	0.849
	2.058	2.881				1.286	0.419
	4.217	3.25				0.772	1.436
	2.401	0.642				0.754	0.589
	0.785	0.441				0.575	0.475
	1.168	0.395				0.782	1.029
	5.081	0.503				0.627	0.558
	5.804	1.254				2.271	0.849
	14.301	0.789				0.336	0.689
	6.228	6.13				2.082	0.813
	2.254	2.24				0.395	0.395
	3.569	0.671				0.318	0.45
	4.848	3.71				0.614	0.663
	7.725	1.78				0.558	0.312
	9.451	2.295				0.25	0.257
	11.528	0.65				0.4	2.216
	5.963	0.744				0.187	1.73
	4.214	1.341				1.161	0.95
	2.683	0.263				1.111	0.197
	1.205	6.041				0.395	0.867
	0.813	1.267				0.336	0.419
	2.486	0.533				0.187	0.318
	1.161	0.606				0.257	0.969
	1.285	8.288				1.211	2.294
	2.388	6.368				0.454	2.754
	5.868	13.291				0.636	23.227
	4.158	4.84				0.25	17.72
	2.111	2.447				1.016	0.485
	3.694	2.77				0.487	1.28
	5.99	2.331				0.4	1.457
	17.125	0.671				12.358	1.286
	0.589	5.603				13.336	2.067
	0.575	2.24				15.189	0.789
	0.849	6.397				8.361	1.591
	1.322	1.94				8.056	0.312
	1.235	4.14				4.239	0.624
	0.73	12.694				13.173	2.468
	1.166	3.157				2.301	0.689
	1.211	1.085				1.335	1.661
	2.077	1.958				2.093	2.83
	0.589	2.08				1.34	1.192
	0.503	4.169				1.61	0.454
	0.821	2.131				3.087	1.776
	1.895	1.374				1.954	0.642
	5.19	0.873				0.437	0.487
	0.672	1.111				1.757	1.483
	0.499	0.454				1.591	1.873
	0.928	1.68				0.395	0.515
	2.166	5.681				2.384	0.589
	0.336	0.689				0.821	0.45
	1.689	1.139				3.019	2.821
	1.689	3.182				2.136	0.45
	1.457	4.806				1.545	0.225
	0.759	0.312				1.943	0.374
	2.607	0.977				0.977	1.415
	0.395	1.402				1.638	0.811
	0.353	0.441				2.468	0.537
	0.364	2.388				0.537	0.257
	0.537	0.969				0.533	0.503
	0.987	0.772				2.565	0.689
	0.441	0.312				2.213	0.45
	0.575	6.153				1.959	0.813
	0.176	1.145				0.642	1.622
	1.063	1.658				1.408	1.541
	2.237	3.492				2.648	0.589
	0.592	3.893				3.181	0.754
	3.221	1.499				2.458	0.312
	0.782	0.642				0.197	0.499
	1.35	2.763				1.451	0.4
	1.016	1.757				1.721	0.754
	1.023	0.503				2.085	0.318
	1.8	0.558				2.846	0.279
	1.008	0.364				1.374	1.312
	1.55	0.728				1.881	2.121
	0.642	0.686				0.437	1.436
	10.857	3.118				0.799	0.636
	5.073	0.515				0.794	0.728
	1.622	1.066				3.886	2.187
	1.898	1.703				0.921	1.211
	2.237	8.46				0.698	0.975
	1.91	2.031				0.562	0.589
	1.451	1.231				1.161	0.4
	0.936	0.772				0.9	0.849
	2.665	0.728				4.794	1.229
	1.15	9.208				1.713	0.952
	3.721	6.506				0.969	0.969
	2.368	3.497				0.558	0.395
	1.5	0.627				0.487	1.619
	1.455	3.098				0.503	1.125
	1.038	5.565				0.503	0.977
	1.248	0.487				1.09	2.321
	1.5	2.074				2.384	1.029
	1.192	1.286				0.811	2.211
	1.15	3.032				0.454	1.74
	1.068	0.441				1.765	1.56
	1.316	1.873				0.353	1.374
	1.063	0.395				0.503	2.322
	0.893	0.867				0.487	1.627
	0.944	1.751				3.001	1.564
	0.565	5.505				0.821	2.783
	0.893	4.069				1.303	0.265
	1.262	2.623				1.457	1.734
	1.665	0.837				1.836	0.837
	0.759	0.651				1.935	0.813
	1.116	0.882				1.334	1.37
	0.954	2.391				1.125	0.762
	2.372	0.837				2.686	1.312
	1.545	0.312				0.876	1.368
	1.229	5.009				0.515	1.623
	1.205	4.067				0.759	1.061
	3.785	2.322				6.277	1.205
	1.15	4.783				0.475	1.023
	0.811	0.419				0.882	2.922
	5.653	1.091				0.318	2.96
	0.869	4.301				0.811	2.261
	0.893	1.334				0.265	2.296
	3.067	3.029				0.395	0.789
	4.973	0.876				0.265	1.385
	9.882	1.2				0.38	1.263
	2.205	0.565				1.766	1.145
	7.235	2.506				0.454	1.998
	8.296	0.575				0.353	2.62
	13.121	0.475				0.867	2.654
	11.107	0.395				2.315	39.727
	3.746	5.408				0.336	9.415
	3.611	2.769				1.523	2.301
	2.546	2.362				1.125	2.121
	2.208	0.95				1.139	3.824
	1.402	0.762				2.125	1.191
	0.698	1.006				0.187	0.686
	1.381	1.872				5.32	1.749
	1.926	5.955				3.581	1.765
	0.533	3.06				2.754	1.763
	2.271	0.663				6.624	4.48
	2.271	0.575				3.188	2.121
	0.893	4.115				1.901	2.456
	0.533	0.624				1.132	0.811
	2.213	1.231				1.005	0.869
	0.977	0.589				0.448	0.813
	0.374	11.098				1.341	1.68
	1.721	1.395				0.3	0.672
	2.527	2.093				0.372	1.423
	2.515	3.574				1.769	1.184
	0.837	1.835				1.299	2.903
	0.197	1.09				0.6	1.023
	0.225	0.624				2.272	1.689
	0.952	1.226				0.424	3.125
	0.751	1.623				0.671	1.545
	4.158	0.374				0.6	1.09
	1.033	0.25				0.485	0.45
	1.61	0.187				0.372	2.349
	0.4	0.374				0.343	1.077
	0.197	0.364				1.547	1.248
	0.257	1.147				0.533	0.789
	0.187	1.066				0.671	0.811
	0.45	1.263				3.828	1.535
	0.728	0.672				1.86	0.441
	0.353	0.395				4.028	1.192
	2.132	1.123				4.685	0.837
	1.061	1.09				4.919	2.031
	0.651	1.125				1.755	2.183
	0.789	11.818				1.385	0.754
	1.016	0.515				5.172	1.809
	1.09	0.562				1.302	2.25
	1.402	1.686				1.259	1.571
	0.636	1.564				1.344	2.408
	0.908	0.928				3.068	1.378
	4.5	0.893				1.085	3.63
	1.926	1.703				0.588	2.359
	1.898	1.5				0.6	0.9
	1.344	1.111				1.527	1.006
	0.454	1.738				0.416	0.908
	0.73	0.869				0.884	1.091
	0.318	1.959				2.16	0.318
	0.558	8.807				4.84	0.265
	2.518	2.132				2.311	0.689
	1.483	4.451				3.42	0.627
	3.432	1.451				0.9	0.698
	0.977	0.475				3.911	1.479
	0.813	0.38				0.448	1.561
	2.583	1.229				0.416	1.758
	2.376	1.738				0.671	0.928
	1.5	4.247				0.588	2.309
	0.062	2.491				5.611	2.391
	0.928	0.975				2.418	1.735
	1.766	1.758				0.686	1.565
	0.936	1.145				1.825	1.877
	3.58	1.835				9.037	1.44
	1.523	0.867				0.869	1.35
	0.882	0.975				2.643	0.762
	0.624	0.762				1.065	0.936
	0.873	1.172				0.789	1.334
	0.318	0.336				1.431	1.757
	1.248	1.243				1.901	1.262
	1.006	1.788				12.465	0.869
	1.483	1.249				2.055	1.598
	2.151	1.2				1.57	0.663
	3.995	0.813				2.284	0.533
	1.938	1.424				0.358	0.575
	2.06	1.256				0.474	2.288
	3.624	1.385				3.097	1.254
	3.188	1.898				0.377	0.624
	4.73	2.684				0.45	1.686
	0.928	0.711				3.321	1.172
	0.558	0.364				1.671	0.969
	0.592	0.475				1	0.45
	0.832	1.835				1.332	0.73
	1.886	1.697				1.192	0.882
	1.424	1.518				1.171	1.059
	1.647	15.574				1.306	0.689
	1.74	4.762				0.596	0.813
	1.235	8.346				1.213	4.483
	0.279	13.923				1.12	0.794
	2.924	3.639				1.385	1.046
	5.697	8.577				0.501	2.477
	6.523	7.508				0.728	1.674
	0.575	9.04				0.686	1.402
	0.675	0.448				0.485	1.147
	6.814	4.421				0.333	2.368
	18.163	0.686				0.377	0.998
	2.583	1.796				1.375	1.15
	4.612	13.625				1.206	3.683
	2.232	2.132				1.491	1.822
	1.248	1.251				0.584	6.902
	5.322	0.753				0.372	2.215
	8.02	2.003				0.853	1.8
	1.915	1.453				0.728	23.549
	2.169	1.191				0.829	1.237
	0.832	0.372				0.579	0.711
	2.06	1.302				0.558	0.919
	2.06	0.744				7.947	0.575
	1.237	0.471				4.503	0.921
	1.534	1.065				1.672	0.537
	1.684	0.884				0.526	2.184
	1.377	0.785				2.873	0.312
	3.572	1.341				1.116	1.298
	4.54	0.686				0.65	1.461
	0.819	2.423				2.184	0.515
	8.582	4.104				4.252	0.336
	5.459	0.836				0.416	1.395
	6.356	0.919				0.333	1.322
	3.871	0.6				2.982	2.956
	5.238	0.448				1.915	1.111
	0.558	0.353				0.9	0.73
	0.558	0.716				1.2	1.784
	0.824	0.93				0.588	1.412
	1.119	0.606				0.856	1.123
	0.506	2.105				4.236	2.058
	0.558	2.003				4.39	1.473
	0.915	2.497				13.708	0.575
	0.819	2.081				4.666	1.676
	0.819	8.112				2.188	2.262
	0.785	5.829				1.998	2.294
	0.744	4.236				8.308	0.624
	1.119	5.794				0.759	1.15
	0.819	0.671				3.269	0.987
	2.271	1.2				0.374	6.533
	0.856	1.607				0.952	4.131
	1.132	0.533				0.257	3.255
	5.178	0.533				1.622	0.811
	2.353	1.165				2.025	3.072
	8.814	2.765				2.493	1.634
	7.594	3.664				0.95	3.142
	1.651	1.302				1.238	1.063
	1.481	0.896				1.822	1.499
	1.651	1.472				0.533	9.654
	3.534	1.607				0.614	1.273
	0.869	1.529				1.262	7.654
	0.896	1.182				1.68	1.757
	0.896	1.786				2.183	1.192
	2.588	1.191				0.503	1.161
	1.715	3.188				0.437	0.782
	1.315	1.713				0.225	0.441
	3.471	2.902				0.257	0.4
	0.97	0.671				1.15	0.454
	0.706	1.832				0.503	0.711
	0.506	1.578				1.2	0.975
	0.819	2.526				1.44	0.364
	0.166	5.874				0.811	0.312
	0.448	5.005				1.757	0.312
	0.25	19.261				1.205	0.728
	4.359	0.93				0.575	0.364
	0.65	3.274				0.782	1.424
	0.819	1.684				1.077	1.565
	1.529	1.563				0.4	4.063
	1.707	1.156				1.385	0.663
	4.39	6.109				1.991	1.147
	2.906	3.24				0.711	3.409
	0.749	16.812				1.334	2.147
	0.856	0.533				1.063	1.263
	0.711	0.485				0.821	0.4
	2.888	0.526				1.994	1.147
	2.01	0.343				0.318	1.184
	4.242	0.789				1.994	1.106
	5.291	0.485				3.824	1.13
	0.353	0.506				0.575	9.281
	0.856	0.93				0.589	0.575
	0.533	0.832				0.869	0.454
	1.765	0.819				0.38	0.312
	2.902	0.588				1.363	1.125
	3.341	0.671				2.085	0.73
	1.765	0.372				0.772	1.218
	1.116	0.65				1.023	0.542
	0.634	0.97				0.751	1.456
	1.094	1.341				2.846	1.664
	2.16	0.424				0.503	0.817
	3.467	0.558				1.861	1.755
	0.582	0.485				0.614	0.836
	0.65	0.353				0.73	0.291
	0.25	11.83				0.698	0.358
	0.3	1.658				0.395	1.635
	0.333	11.64				0.197	0.689
	0.526	4.048				0.698	0.658
	0.372	4.768				1.063	0.799
	0.533	4.212				0.441	1.142
	0.506	3.773				2.316	3.28
	0.372	3.271				0.636	0.819
	0.263	3.511				0.45	1.863
	20.13	16.028				0.952	1.116
	12.876	11.817				0.312	1.825
	4.947	4.802				4.173	1.326
	12.009	2.22				0.565	1.098
	7.083	7.636				0.487	2.085
	10.399	4.662				0.503	8.61
	35.406	2.401				1.622	8.703
	1.27	3.028				0.4	13.731
	1.474	6.996				1.038	0.663
	2.196	0.558				0.624	0.921
	7.304	1.156				0.751	2.688
	1.11	1.977				4.449	0.419
	1.847	5.977				23.144	0.312
	1.763	3.087				8.946	1.046
	0.6	6.447				2.663	1.316
	0.941	4.437				7.13	1.125
	1.707	4.903				0.949	1.535
	0.711	13.785				5.861	0.503
	3.025	6.764				16.839	0.711
	0.998	3.789				1.86	0.642
	2.913	2.169				7.761	1.029
	0.753	0.93				3.521	0.821
	4.08	1.11				2.648	1.44
	1.707	1.085				1.565	0.944
	1.684	1.778				1.473	0.706
	1.27	0.998				0.908	1.385
	0.856	1.658				0.751	6.49
	0.235	1.763				4.206	1.298
	0.832	1.832				1.545	0.936
	1.769	4.282				0.575	0.565
	1.984	1.453				0.364	0.4
	1.942	2.941				1.147	0.672
	1.589	6.608				0.624	0.813
	1.615	1.607				0.952	0.503
	0.819	1.191				1.368	0.811
	0.744	3.42				0.336	1.457
	0.848	2.71				0.503	0.257
	1.395	1.334				0.515	0.839
	2.046	0.686				0.751	0.515
	1.5	0.526				0.575	2.155
	1.165	0.93				1.046	2.718
	1.165	1.658				3.012	1.457
	2.395	2.08				0.749	1.909
	2.962	4.671				0.336	1.986
	1.119	1.488				0.882	0.374
	0.448	1.796				2.294	0.813
	3.784	1.191				0.928	0.575
	3.211	0.558				0.437	1.344
	2.897	0.634				0.503	0.558
	4.767	0.526				1.008	0.73
	2.331	0.372				2.052	0.651
	6.323	1.159				0.558	1.571
	4.886	3.349				1.819	0.503
	0.716	2.425				0.821	0.515
	0.263	1.116				0.837	1.15
	0.416	0.836				0.672	1.959
	1.119	0.588				1.35	1.285
	3.692	0.949				0.454	0.893
	1.065	1.385				0.977	1.598
	2.284	1.156				4.998	0.928
	1.684	1.176				0.686	2.651
	0.767	0.836				0.821	1.023
	1.825	0.753				0.751	0.395
	5.841	0.588				1.888	2.633
	0.416	0.533				2.208	0.987
	0.6	0.9				1.594	2.269
	0.499	1.081				0.832	1.273
	2.188	1.664				0.762	1.665
	0.915	1.414				1.033	1.123
	0.744	0.65				3.184	2.078
	0.919	2.414				0.944	1.947
	0.558	5.009				2.309	1.259
	0.083	1.341				3.479	0.95
	0.118	1.132				2.933	1.374
	7.276	1.682				1.591	1.58
	4.836	1.029				2.786	3.018
	4.016	7.321				0.794	1.402
	2.534	0.606				0.813	1.177
	2.024	0.372				0.353	1.622
	5.156	0.333				0.336	0.893
	2.301	1.639				0.954	1.324
	3.188	2.147				0.849	1.166
	0.235	0.97				1.316	1.508
	0.263	0.333				0.197	1.368
	11.737	0.634				0.663	0.437
	0.424	1.065				2.173	0.698
	0.424	0.448				1.44	0.686
	0.416	4.209				0.589	1.335
	0.884	1.002				0.537	0.663
	1.529	0.533				0.312	1.312
	2.085	0.416				0.487	2.921
	0.25	35.615				1.35	1.2
	0.25	13.332				0.503	1.503
	1.237	8.239				0.749	0.698
	0.6	3.66				0.25	1.509
	0.526	3.126				0.614	2.423
	1.651	2.58				0.441	1.62
	0.671	2.031				0.751	0.636
	1.377	1.684				0.364	1.059
	0.634	7.374				1	1.145
	10.562	0.754				0.499	0.575
	36.255	0.592				0.45	0.675
	9.605	2.881				0.575	3.962
	12.529	2.81				3.694	0.663
	13.72	2.097				0.592	0.503
	6.04	2.4				0.529	3.773
	1.674	0.832				2.336	13.498
	0.503	1.848				1.436	21.388
	0.257	0.839				2.166	9.071
	4.873	0.353				1.488	7.733
	3.831	1.263				1.262	2.121
	1.15	2.111				4.239	0.257
	0.849	0.782				13.549	0.839
	0.312	0.73				4.998	1.541
	0.125	1.184				22.903	1.059
	0.849	1.599				8.771	0.312
	0.759	2.686				11.83	0.762
	0.651	1.953				4.948	0.503
	3.706	1.256				8.288	0.487
	2.518	2.89				3.592	1.139
	0.751	2.935				0.686	2.037
	1.761	4.184				1.344	1.147
	0.38	4.069				0.634	1.451
	1.35	12.575				1.5	3.521
	1.116	8.922				1.085	0.944
	0.711	4.274				0.848	3.627
	0.197	3.266				0.6	0.45
	1.676	1.326				1.997	1.226
	1.326	2.067				0.941	0.437
	0.503	1.638				3.507	2.391
	0.975	0.969				1.156	2.134
	1.286	0.624				1.116	0.928
	0.869	0.475				2.24	0.928
	1.006	1.038				2.132	0.624
	0.537	1.503				0.416	1.685
	1.37	1.998				4.828	1.591
	0.799	0.977				0.416	1.077
	3.374	1.424				0.533	1.243
	2.12	2.515				1.081	0.624
	0.799	1.877				1.237	1.991
	0.754	1.395				0.767	0.558
	1.023	0.312				0.526	0.312
	1.15	0.575				1.377	0.533
	0.312	0.187				0.856	1.177
	1.374	0.562				1.341	0.849
	0.575	0.575				1.826	0.374
	0.849	0.675				3.758	1.898
	1.111	2.819				0.448	0.839
	0.887	0.867				0.485	1.046
	0.928	1.066				0.666	2.651
	0.487	2.016				0.919	5.033
	1.13	0.938				1.159	3.648
	2.79	1.229				1.191	1.286
	0.837	2.74				1.547	1.591
	0.454	1.784				0.832	0.944
	2.119	1.424				1.414	1.685
	0.503	1.509				0.949	1.751
	4.046	1.116				1.267	0.95
	1.073	1.006				2.014	9.943
	1.303	1.286				0.949	1.09
	3.974	1.029				7.077	1.68
	2.166	1.248				1.972	1.125
	0.711	0.762				1.081	2.058
	1.335	0.487				1.315	1.256
	4.442	2.924				2.663	0.882
	0.627	1.994				1.715	1.905
	3.321	1.503				1.431	7.986
	0.849	2.044				1.412	2.496
	0.789	0.813				2.604	1.185
	1.726	0.837				4.962	0.921
	4.995	4.024				5.75	1.344
	2.468	0.689				0.97	0.475
	2.125	0.821				3.884	3.005
	1.68	0.4				3.132	0.441
	2.561	0.672				1.417	1.735
	0.987	0.38				1.182	1.402
	1.187	0.437				1.422	0.762
	3.133	0.537				1.825	1.564
	3.656	0.624				0.785	0.374
	1.147	0.624				0.744	1.229
	1.809	0.565				0.785	1.2
	3.565	0.782				2.414	0.782
	1.066	0.575				4.976	1.298
	0.675	0.614				0.686	0.312
	0.873	0.312				0.716	0.987
	0.4	0.873				0.767	0.38
	0.374	1.31				0.343	3.508
	0.537	1.177				1.563	5.96
	1.016	1.426				0.343	0.689
	2.376	2.459				3.386	2.506
	1.15	2.752				0.506	1.038
	0.882	12.083				0.372	3.672
	0.499	4.764				1.488	0.515
	0.614	15.95				0.485	1.145
	0.395	4.836				1.554	1.172
	2.72	6.977				0.333	1.15
	2.607	9.483				0.372	4.203
	0.38	20.319				0.166	0.503
	0.419	27.595				3.366	3.257
	0.364	8.941				3.059	0.624
	1.125	3.052				0.485	0.529
	1.073	8.339				3.312	0.95
	0.533	2.545				0.606	1.125
	2.162	1.666				0.424	0.45
	0.686	0.65				0.343	0.614
	0.751	0.3				0.448	18.705
	0.125	1.385				1.132	7.427
	1.758	3.945				0.836	0.711
	0.762	1.191				1.472	1.291
	5.975	1.132				0.634	4.615
	8.889	1.302				1.5	0.869
	5.647	1.825				1.472	0.706
	1.488	1.455				13.534	1.286
	0.372	0.949				5.874	0.565
	0.824	0.896				5.092	5.369
	0.767	0.333				8.399	1.787
	10.485	0.448				7.728	0.811
	17.389	0.424				1.877	4.643
	12.738	0.671				0.9	1.285
	16.266	1.299				0.848	0.38
	11.478	0.716				0.896	1.796
	10.066	2.184				7.833	0.558
	4.499	3.118				3.953	0.279
	1.168	1.176				0.9	0.437
	1.778	2.081				1.417	1.324
	0.819	2.872				1.915	1.177
	0.819	1.015				1.563	2.848
	4.041	4.544				1.581	1.922
	0.856	2.414				1.453	1.935
	2.106	2.839				3.354	1.211
	0.634	2.003				0.949	1.363
	0.974	1.715				0.716	1.535
	1.029	2.795				0.919	7.794
	1.029	1.731				0.832	1.62
	0.93	0.832				1.119	1.986
	0.671	0.856				3.315	0.627
	1.119	2.289				0.606	0.537
	3.005	0.93				1.176	2.737
	4.226	3.415				1.315	1.312
	1.364	1.085				0.499	1.949
	3.762	2.769				2.815	1.578
	3.878	2.563				2.121	2.995
	3.612	7.192				0.416	3.05
	1.589	2.796				0.558	0.533
	2.184	0.65				5.212	0.627
	1.93	1.963				0.671	1.211
	1.963	1.534				0.499	0.537
	2.79	1.977				0.97	0.762
	2.888	2.248				1.674	1.006
	4.826	2.584				0.485	1.09
	1.977	2.769				0.9	0.821
	3.185	1.159				1.251	3.819
	6.582	1.052				3.646	2.397
	2.843	2.066				1.731	1.451
	1.935	4.575				3.312	3.069
	1.081	0.819				1.414	1.819
	1.395	1.27				1.453	1.166
	0.949	0.606				1.414	1.256
	1.412	1.176				0.448	1.881
	0.582	1.488				1.364	6.725
	1.081	1.672				1.915	8.807
	0.634	3.572				2.012	1.172
	0.65	0.93				0.533	0.944
	1.997	2.413				0.65	2.037
	3.213	1.527				5.125	0.558
	0.949	0.416				0.526	0.811
	6.316	1.354				0.832	0.839
	1.684	0.949				0.671	1.229
	1.015	1.886				3.346	1.256
	3.935	0.499				0.372	4.721
	0.558	1.094				0.558	0.954
	1.159	1.065				0.372	0.395
	2.591	0.558				4.582	0.977
	7.238	2.163				1.132	0.936
	3.42	2.894				1.488	1.344
	3.346	1.634				1.713	0.887
	2.611	0.65				0.93	17.44
	3.014	1.094				1.052	2.111
	5.093	0.485				1.299	0.589
	1.547	1.176				4.4	0.921
	1.472	1.431				1.248	1.177
	8.001	2.863				0.97	2.122
	1.472	0.671				9.042	1.545
	1.002	0.716				4.875	0.636
	3.005	2.272				3.196	4.218
	1.315	3.079				4.295	1.703
	1.059	2.643				0.6	0.813
	5.795	1.731				2.384	0.651
	0.25	1.302				1.002	1.28
	0.848	0.744				0.671	0.592
	0.9	2.184				1.237	4.21
	2.663	30.992				1.57	0.936
	5.59	5.327				0.824	0.562
	1.481	8.155				0.767	2.144
	1.472	4.582				1.299	1.147
	2.591	4.015				0.767	1.591
	1.182	3.329				1.334	0.454
	1.156	6.184				3.673	0.936
	1.119	4.167				0.785	0.589
	0.767	9.034				2.356	0.589
	0.485	8.836				3.028	0.503
	0.416	5.331				0.485	2.613
	3.179	0.869				1.182	1.578
	7.572	14.363				1.5	4.621
	0.93	1.119				0.558	0.592
	1.518	1.002				0.848	18.655
	0.789	0.499				0.526	25.942
	1.6	0.533				1.191	25.596
	0.919	0.819				1.942	5.025
	8.243	0.471				2.496	3.6
	0.869	1.251				1.417	1.27
	0.716	2.058				0.949	6.574
	10.145	1.002				11.954	1.682
	15.353	0.65				2.01	1.826
	9.875	1.453				10.052	0.686
	7.321	0.949				5.484	0.753
	2.353	0.915				10.194	0.65
	1.641	1.942				7.737	1.607
	1.949	2.606				1.534	0.372
	4	0.767				0.819	1.002
	21.399	0.97				1.182	0.671
	13.354	2.458				2.78	0.582
	7.896	1.364				0.618	1.684
	14.863	1.921				0.636	0.754
	5.589	3.981				1.35	1.256
	5.882	4.244				5.418	2.105
	4.353	6.948				6.414	0.813
	5.284	3.6				1.286	1.13
	2.654	0.832				1.187	0.592
	5.534	3.744				0.624	2.254
	4.626	0.6				0.503	1.435
	2.379	1.658				1.066	1.006
	5.88	0.749				0.751	0.821
	2.447	1.497				1.363	1.023
	1.769	2.012				0.4	0.832
	2.272	0.424				0.565	0.614
	1.963	1.422				2.597	0.698
	9.274	1.901				0.318	2.294
	10.034	3.394				0.25	0.837
	20.691	1.737				0.475	1.256
	5.32	9.026				0.908	1.166
	6.367	1.615				0.562	0.813
	1.607	1.949				1.658	0.312
	1.915	0.671				0.618	1.898
	1.377	2.418				1.211	0.73
	0.919	2.105				1.2	1.503
	1.116	3.542				2.762	1.765
	0.499	8.874				0.318	0.395
	2.667	2.413				0.537	3.907
	1.159	3.66				0.789	2.269
	0.711	2.414				0.257	0.672
	0.711	1.581				0.454	0.711
	1.065	1.052				0.312	0.312
	3.145	2.414				0.336	1.523
	0.448	1.27				2.058	0.503
	1.651	2.343				2.41	0.726
	1.165	3.503				2.097	0.266
	0.974	1.372				1.374	0.542
	2.546	2.031				1.029	0.343
	4.25	2.349				0.475	0.737
	2.066	1.315				1.91	0.353
	2.105	2.765				0.971	0.689
	4.727	1.731				1.695	0.795
	3.573	2.53				1.172	0.3
	1.825	2.272				0.419	0.874
	1.731	2.563				0.25	1.707
	1.385	2.413				1.106	1.491
	4.295	1.963				0.45	0.635
	4.44	4.435				0.754	2.441
	4.662	0.949				0.537	0.303
	1.132	3.013				0.627	0.542
	0.949	1.472				0.565	1.354
	3.444	2.464				2.097	1.447
	2.7	2.77				0.938	1.343
	5.299	4.588				1.872	0.965
	2.121	0.949				2.021	0.726
	4.903	1.302				1.378	0.777
	2.765	1.921				1.545	0.75
	0.372	2.058				1.016	1.872
	0.424	1.497				0.225	1.886
	0.416	0.785				0.503	1.052
	0.448	2.272				0.908	1.043
	0.263	1.658				1.248	1.098
	0.533	3.024				1.286	2.195
	3.179	4.076				0.318	2.297
	1.422	1.765				0.506	0.335
	0.767	1.176				0.671	0.842
	0.949	1.972				0.132	0.635
	0.896	4.702				0.82	1.06
	0.974	5.907				1.132	1.378
	1.116	1.86				0.808	0.986
	0.506					0.677	0.566
	4.21					0.355	0.224
	1.012					0.651	0.506
	1.769					0.728	0.588
	0.471					0.841	0.943
	1.372					1.512	0.916
	1.132					0.767	0.355
	0.785					0.374	0.533
	0.869					0.588	3.634
	1.825					0.333	1.581
	0.671					0.303	2.974
	0.485					2.062	1.627
	0.588					3.299	0.726
	0.848					0.958	0.243
	0.749					0.686
	1.755					0.826
	5.784					0.474
	1.882					0.325
	1.8					0.618
	4.509					1.388
	0.706					1.06
	0.671
	0.856
	0.884
	0.416
	1.27
	0.671
	1.042
	1.684
	1.341
	1.299
	1.182
	3.061
	1.664
	2.003
Figure 2—figure supplement 1E
Mitochondrial shape (%)
	intermediate	elongated
WT	100	0
WT +Dynasore	100	0
Drp1-KO	0	100
Figure 2—figure supplement 1F
The cells (%) that show the localization of Drp1ABCD at the plasma membrane
Dynasore:	-	+
	80	67.92
	84.48	91.23
	90.91	82.35
