# Supplementary material for: Brain-specific Drp1 regulates postsynaptic endocytosis and dendrite formation independently of mitochondrial division
Source: eLife. 2019 Oct 11;8:e44739. doi: 10.7554/eLife.44739 (PMC6824841; doi:10.7554/eLife.44739)
Supplement: Figure 2—source data 1. [file elife-44739-fig2-data1.xlsx]

## Sheet: Fig2
Figure 2C
Body weight (g) of WT and KO mice
WT	33.8	38.5	29.7	32.1
KO	34.8	43.9	31.5	29.7
Figure 2D
Brain weight (mg) of WT and KO mice
WT	490	465	534	527	530
KO	470	450	543	485	498
Figure 2G
Hippocampus CA1 layer thickness (µm) of WT and KO mice
WT	28.9203	26.3611	29.4903
KO	30.1779	22.7179	28.059
Figure 2I
Number of CCPs per synapses (%) at the postsynaptic terminal
WT	4.79	5.1	6.98	3.66
KO	9.49	11.8	13.61	12.22
Figure 2J
Number of CCPs per synapses (%) at the prestsynaptic terminal
WT	2.99	2.04	0.58	4.19
KO	6.96	2.48	2.96	4.07
Figure 2L
Number of CCPs per synapses (%) with three different morphologies
Shallow	WT	1.79641	2.55102	4.06977	1.57068
	KO	4.43038	6.21118	5.91716	6.33484
U	WT	1.19761	2.04082	1.16279	1.57068
	KO	4.43038	4.96894	5.32544	3.61991
Omega	WT	0.5988	0.5102	1.74419	0.52356
	KO	0.63291	0.62112	2.36686	2.26244
Figure 2N
Number of CCPs per synapses (%) at the postsynaptic terminal following treatment of Dynasore
	Dynasore
WT	-	5.03145	6.04396	2.90698
	+	19.0789	19.0184	21.6783
KO	-	13.6364	11.0429	14.7287
	+	12.3457	12.3288	13.7931
Figure 2P
Size of mitochondria (µm2) following treatment of Dynasore
	WT		KO
Dynasore:	-	+	-	+
	0.048439	0.112834	0.11742	0.132325
	0.132038	0.062197	0.160605	0.145796
	0.053025	0.078439	0.139108	0.058376
	0.095828	0.082548	0.099554	0.047675
	0.112166	0.148567	0.058662	0.071847
	0.074713	0.066688	0.046911	0.078344
	0.128981	0.060669	0.030764	0.056656
	0.111879	0.10328	0.091338	0.037739
	0.102134	0.072994	0.141306	0.113217
	0.182771	0.095255	0.046529	0.190414
	0.06086	0.085701	0.037834	0.048535
	0.09793	0.14293	0.040414	0.035064
	0.058376	0.135955	0.051879	0.253949
	0.03449	0.145127	0.108726	0.101943
	0.129936	0.079586	0.145127	0.10328
	0.075764	0.116943	0.112166	0.087516
	0.166146	0.101083	0.120955	0.148567
	0.056369	0.032866	0.039268	0.088471
	0.059331	0.103662	0.168344	0.052261
	0.133567	0.101561	0.071847	0.127357
	0.096975	0.066783	0.112452	0.06535
	0.069172	0.165478	0.156115	0.113599
	0.083025	0.054363	0.211338	0.088376
	0.098121	0.130318	0.156401	0.06965
	0.09793	0.085892	0.062006	0.069554
	0.046911	0.022357	0.064299	0.086274
	0.145318	0.029236	0.035637	0.050159
	0.173981	0.20379	0.094108	0.11293
	0.046815	0.07051	0.079777	0.049586
	0.099268	0.103185	0.05914	0.053599
	0.123822	0.040032	0.129076
		0.044713	0.057516
Figure 2Q
Number of CCPs per synapses (%) at the postsynaptic terminal following treatment of NMDA/Gly and Dynasore
	NMDA/Gly	Dynasore		4.09	3.52	5.35
WT	-	-	3.66	6.45	5.5	9.33
	+	-	5.84	9.38	9.47
	-	+	6.29	12.72	16.97
	+	+	12.11	13.07	10.76	14
KO	-	-	11.95	6.43	9.62	9.69
	+	-	7.96	14.36	15.04
	-	+	12.43	15.71	14.75
	+	+	14.29
Figure 2R
Number of CCPs per synapses (%) at the presynaptic terminal following treatment with/without NMDA/Gly and Dynasore
	NMDA/Gly	Dynasore		3.51	4.52	2.14
WT	-	-	3.66	5.16	4.5	2
	+	-	2.92	2.6	3.16
	-	+	3.43	3.47	4.24
	+	+	4.21	2.61	6.33	5.95
KO	-	-	4.4	4.29	1.92	3.57
	+	-	3.54	6.38	3.01
	-	+	2.96	2.09	3.28
	+	+	6.86
