# Supplementary material for: Brain-specific Drp1 regulates postsynaptic endocytosis and dendrite formation independently of mitochondrial division
Source: eLife. 2019 Oct 11;8:e44739. doi: 10.7554/eLife.44739 (PMC6824841; doi:10.7554/eLife.44739)
Supplement: Figure 3—figure supplement 1—source data 1. [file elife-44739-fig3-figsupp1-data1.xlsx]

## Sheet: Fig3-S1
Figure 3—figure supplement 1A
Transferrin uptake (a.u.) at dendrites in cultured neurons
WT	KO
2595.91	1768.85
1891.97	2488.64
2076.2	2215.67
1298.63	1777.5
2310.91	2448.18
3191.04	2312.69
2215.51
1961.27
1802.59
2947.81
Figure 3—figure supplement 1B
Transferrin uptake (a.u.) in MEFs
37 °C			4 °C
KO	KO+BCD	KO+ABCD	KO	KO+BCD	KO+ABCD
636.557	552.604	347.534	138.413	122.244	110.453
545.386	361.027	435.354	254.521	126.886	121.585
493.899	495.893	477.432	121.441	156.456	208.612
329.163	252.461	555.572	133.624	180.722	156.062
629.112	345.62	520.166	142.422	164.556	117.993
538.92	272.481	304.537	122.976	237.912	126.038
554.378	426.247	486.616	173.766	127.555	142.28
459.905	405.563	181.343	93.501	159.215	144.378
425.19	795.445	308.881	175.146	162.236	119.277
495.804	593.74	295.654	165.636	124.507	142.997
231.15	398.265	334.325	139.128	143.29	128.2
290.159	383.414	435.84	103.873	159.735	158.004
261.002	434.836	389.172	103.974	168.788	100.284
281.043	471.539	395.969	109.18	142.805	122.786
224.594	546.163	232.602	98.986	106.034	109.387
285.471	233.704	345.336
347.04	300.045	298.051
351.477	298.344	351.605
204.728	498.489	374.364
675.027	456.263	301.486
165.915	285.628	727.09
321.203	310.933	637.484
210.839	259.346	443.558
228.159	358.883	527.132
365.434	272.457	485.111
