# Supplementary material for: Brain-specific Drp1 regulates postsynaptic endocytosis and dendrite formation independently of mitochondrial division
Source: eLife. 2019 Oct 11;8:e44739. doi: 10.7554/eLife.44739 (PMC6824841; doi:10.7554/eLife.44739)
Supplement: Figure 3—source data 1. [file elife-44739-fig3-data1.xlsx]

## Sheet: Fig3
Figure 3B
EZ negative synapses (%) with/without NMDA stimulation
	WT		KO
NMDA/Gly:	-	+	-	+
	14.0845	18	31.1688	25.4237
	22.0339	18.3486	40	24.2857
	15.3846	26.4706	32.7273	33.3333
	28.8889	16.6667	35.2381	25.4545
	9.09091	18.1818	39.3443	21.7391
	14.2857	22.0588	27.6923	38.4615
	25	22.4138	42.1053	38.4615
	22.6191	15.3846	21.1538	25.4902
	19.403	16.092	34.1463	38.8889
	19.1489	15.8537	14.2857	28.5714
	25.974	10.2564	41.6667	37.0968
	15.942	12.5	47.1429	25
	9.45946	14.2857	30.7692	24.3902
	8.88889	11.9048	14.7541	13.0435
	19.1489		42.8571
Figure 3D
Relative expression levels of AMPARs in WT and KO mice brain
GluR1	WT	1.11381	0.755295	1.13089	1.12945	0.87055
	KO	0.882119	0.976691	0.484758	0.805335	1.05444
GluR2	WT	1.14061	0.697332	1.16206	1.12656	0.873442
	KO	0.73992	0.862791	0.417182	0.947516	0.887221
GluR3	WT	1.16506	0.699877	1.13506	1.18772	0.812279
	KO	0.835076	0.849049	0.427556	1.08582	0.960052
Figure 3F
Surface/Total GFP-GluR1 intensity (a.u.) with/without NMDA stimulation
	WT		KO
NMDA/Gly:	-	+	-	+
	0.954282	0.456533	1.07253	0.265104
	0.934277	0.420138	0.998549	0.390935
	0.855855	0.340204	0.970086	0.466268
	0.722363	0.403709	0.828643	0.386481
	0.943434	0.627863	0.860866	0.352108
	0.804094	0.685372	0.94651	0.688865
	0.735953	0.579368	0.778081	0.856898
	0.87566	0.881205	1.03813	0.550848
	0.9452	0.755642	0.872872	1.11664
	0.963803	0.714498	0.929853	0.472565
	0.325874	0.572088	0.82603	0.979822
	0.639751	0.395779	0.913563	0.598557
	0.534103	0.783482	0.866267	1.1141
	0.378881	0.536486	1.13492	0.163204
	0.512914	0.493548	0.926371	0.704381
	0.777308	0.867501	1.20075	0.604115
	1.04078	0.467633	0.796062	0.636189
	1.12522	0.509141	0.655284	0.611169
	0.926788	0.496097	1.44057	0.52424
	0.749172	0.585993	1.16657	0.648414
	0.966898	0.651451	0.655781	0.511274
	1.05288	0.680681	1.25886	0.676185
	0.776802	0.696374	0.739268	0.390345
	1.008	0.507569	0.963465	0.570726
	0.829217	0.547144	0.862847	0.556716
	0.714801	0.740367	0.444586	0.649674
	0.997064	0.886607	0.438686	0.483925
	1.07904	0.462487	0.557609	0.79089
	0.65658	0.543059	0.43833	0.722157
	1.06617	0.784238	0.533776	0.82291
	0.909075	0.387754	0.618828	0.678622
	0.834708	0.630447	0.783182	0.385328
	0.983759	0.409511	0.64508	0.529131
	0.846263	0.766478	0.678206	0.612203
	0.76427	0.658662	0.649751	0.475205
	0.669575	0.480297	0.909591	0.414816
	0.558185	0.851866	0.816716	0.430256
	0.599048	0.727068	0.719776	0.37612
	0.527235	0.869025	0.723295	0.638758
	0.819995	0.590134	0.610785	0.459349
	0.931899	0.339742	0.53239	0.512812
	0.816915	0.517753	0.476956	0.49742
	1.11817	0.459225	0.497272	0.816709
	1.06263	0.418708	0.582799	1.04295
	0.942358	0.573111	0.549137	0.769555
	0.901849	0.674282	0.466196	0.471767
	0.695829	0.929193	0.735621	0.449763
	0.482245	0.607741	0.414034	0.345034
	0.547352	0.783928	0.594609	0.407605
	0.674235	0.727885	1.14101	0.590154
Figure 3I						Figure 3J
Mitochondrial length (µm) in proximal region						Mitochondrial length (µm) in distal region
	WT	KO					WT	KO
	3.809	14.121					0.205	0.093
	7.902	14.58					0.209	0.15
	0.499	12.578					0.212	0.172
	0.593	4.664					0.212	0.186
	0.316	1.691					0.221	0.186
	1.291	0.78					0.25	0.186
	0.53	1.508					0.256	0.208
	0.419	1.304					0.26	0.224
	2.879	0.379					0.266	0.243
	0.73	4.847					0.271	0.243
	1.864	0.858					0.285	0.263
	0.707	0.368					0.288	0.266
	1.197	0.379					0.294	0.266
	1.024	0.535					0.336	0.294
	0.333	0.429					0.339	0.317
	7.134	0.703					0.342	0.325
	8.809	3.171					0.37	0.325
	2.56	1.03					0.372	0.335
	0.78	1.311					0.392	0.372
	0.626	0.562					0.412	0.377
	7.155	0.335					0.418	0.377
	2.949	0.736					0.438	0.383
	1.747	1.895					0.45	0.395
	0.678	0.595					0.459	0.442
	0.515	0.482					0.503	0.442
	2.976	0.505					0.509	0.459
	0.666	0.853					0.509	0.465
	0.722	0.861					0.533	0.474
	0.493	0.411					0.558	0.508
	0.333	0.688					0.608	0.526
	0.651	2.816					0.624	0.529
	7.178	0.497					0.626	0.533
	0.491	1.198					0.66	0.6
	1.287	1.568					0.666	0.614
	0.626	1.336					0.677	0.629
	1.789	0.618					0.686	0.635
	2.611	2.873					0.691	0.658
	1.384	1.397					0.707	0.765
	2.051	1.222					0.736	0.785
	3.683	1.361					0.741	0.819
	0.773	1.102					0.757	0.916
	0.739	0.812					0.777	1.013
	0.349	1.321					0.798	1.063
	2.745	3.038					0.819	1.12
	2.167	1.721					0.821	1.165
	1.875	2.422					0.844	1.191
	2	1.495					0.881	1.2
	0.593	0.883					0.884	1.213
	5.688	1.693					0.908	1.223
	0.465	0.92					0.912	1.246
	0.465	1.066					0.923	1.27
	3.977	5.06					0.992	1.306
	0.678	0.983					0.997	1.341
	2.884	1.565					1.015	1.489
	5.743	0.736					1.045	1.731
	0.651	1.529					1.046	1.742
	3.31	1.259					1.046	1.742
	2.578	0.812					1.052	1.824
	1.412	2.274					1.06	1.853
	4.344	0.967					1.071	2.236
	0.233	0.426					1.111	2.319
	0.419	0.426					1.137	2.536
	0.606	1.814					1.244	2.995
	2.104	2.265					1.248	3.12
	12.992	1.07					1.249	4.171
	0.651	2.459					1.323	4.853
	2.425	1.471					1.346	6.473
	5.452	0.995					1.357	7.873
	3.236	1.725					1.376	9.183
	0.187	2.614					1.404	9.755
	1.3	0.497					1.442	0.042
	0.208	0.736					1.495	0.125
	0.635	1.067					1.538	0.166
	1.924	4.284					1.618	0.186
	0.885	0.265					1.639	0.186
	1.717	0.406					1.68	0.187
	0.333	1.389					1.697	0.208
	0.491	0.478					1.731	0.212
	0.635	0.312					1.778	0.225
	1.187	0.407					1.843	0.235
	1.187	0.765					2.159	0.25
	4.818	0.347					2.376	0.253
	9.38	0.5					2.446	0.253
	0.375	0.214					3.142	0.303
	1.438	2.267					3.189	0.317
	0.593	1.308					10.782	0.317
	0.444	2.844					26.665	0.333
	0.26	2.171					0.147	0.333
	1.315	1.316					0.166	0.333
	0.265	1.784					0.253	0.335
	0.89	1.387					0.267	0.343
	5.156	0.928					0.3	0.377
	1.89	1.677					0.3	0.383
	1.632	1.633					0.312	0.412
	0.981	1.056					0.336	0.412
	2.169	1.379					0.355	0.428
	0.479	1.733					0.355	0.442
	0.26	1.902					0.358	0.499
	0.479	5.029					0.392	0.508
	2.034	4.369					0.458	0.508
	20.303	6.898					0.468	0.515
	0.52	8.887					0.5	0.526
	1.457	10.552					0.506	0.541
	1.053	1.14					0.506	0.582
	4.534	15.921					0.533	0.588
	0.379	8.679					0.545	0.624
	1.04	3.457					0.563	0.65
	0.406	3.018					0.566	0.671
	0.386	1.508					0.594	0.744
	0.47	1.3					0.6	0.795
	1.308	1.98					0.624	0.808
	1.003	2.096					0.624	0.808
	1.957	2.039					0.671	0.832
	0.329	0.895					0.675	0.882
	0.368	0.71					0.681	1.015
	0.303	0.959					0.684	1.098
	0.354	1.632					0.689	1.111
	5.455	0.56					0.69	1.171
	1.722	0.404					0.721	1.174
	0.411	3.548					0.763	1.178
	0.499	2.077					0.817	1.198
	0.662	0.725					0.821	1.372
	0.806	0.779					0.828	1.447
	0.478	0.786					0.832	1.5
	0.469	0.937					0.885	1.589
	1.813	0.349					0.893	1.62
	1.56	0.247					0.9	1.679
	0.904	0.801					0.914	1.679
	0.885	1.991					0.921	1.726
	3.806	1.904					0.958	1.823
	3.182	3.832					0.967	1.855
	0.42	8.108					0.982	1.927
	0.536	4.225					1.005	2.06
	0.443	7.51					1.103	2.297
	0.276	3.986					1.124	2.331
	0.643	1.629					1.15	2.4
	1.342	0.813					1.169	2.767
	1.56	0.846					1.238	2.849
	3.51	0.893					1.265	2.862
	0.526	0.832					1.269	2.865
	0.812	2.006					1.296	2.988
	0.607	0.362					1.296	3.012
	0.369	1.291					1.304	3.257
	0.379	2.036					1.315	3.473
	0.688	6.739					1.415	4.241
	0.5	0.849					1.495	4.805
	7.477	0.913					1.5	5.225
	2.657	1.93					1.658	5.608
	1.847	1.349					1.674	5.706
	0.333	0.13					1.697	6.802
	4.534	1.013					1.703	9.962
	1.457	0.78					1.737	0.093
	1.174	1.511					1.817	0.118
	2.613	1.456					1.843	0.253
	0.698	5.121					1.962	0.253
	0.294	1.012					1.964	0.263
	1.214	1.291					2.152	0.265
	1.652	2.037					2.243	0.279
	0.993	1.586					2.333	0.291
	3.608	0.39					2.387	0.3
	0.406	0.296					2.49	0.325
	2.099	0.865					2.563	0.335
	1.041	0.765					2.804	0.358
	1.851	0.316					2.868	0.364
	0.698	0.874					3.133	0.372
	9.57	0.28					3.314	0.374
	2.167	0.291					3.551	0.383
	1.656	0.372					3.779	0.4
	2.27	3.373					3.871	0.442
	0.646	3.824					3.946	0.442
	0.329	0.189					4.258	0.442
	0.386	0.776					4.588	0.448
	1.102	1.103					4.711	0.448
	0.333	0.553					5.01	0.45
	0.65	7.67					5.099	0.45
	0.398	3.129					6.258	0.465
	1.142	1.861					6.933	0.475
	0.375	0.78					8.321	0.487
	1.932	1.028					0.129	0.506
	0.889	0.635					0.15	0.508
	9.449	0.386					0.15	0.508
	1.196	0.62					0.2	0.515
	1.284	0.773					0.208	0.541
	1.328	2.346					0.244	0.542
	1.564	1.081					0.25	0.591
	1.015	0.369					0.25	0.618
	0.593	0.369					0.294	0.618
	0.589	0.234					0.296	0.625
	0.533	1.69					0.325	0.65
	1.3	7.711					0.337	0.658
	0.349	1.218					0.343	0.667
	1.384	3.64					0.372	0.707
	1.4	1.179					0.392	0.736
	3.31	0.883					0.395	0.744
	6.348	1.219					0.412	0.762
	1.442	0.655					0.412	0.767
	1.442	1.994					0.412	0.826
	0.57	2.783					0.412	0.836
	0.577	0.874					0.424	0.842
	0.547	0.397					0.471	0.858
	2.871	0.523					0.474	0.877
	1.022	0.461					0.475	0.884
	22.789	0.928					0.475	0.896
	6.398	0.983					0.504	0.919
	19.262	3.33					0.521	0.936
	6.291	6.255					0.529	0.96
	1.218	15.48					0.542	1.005
	1.28	21.791					0.56	1.016
	1.334	26.772					0.575	1.06
	1.695	7.212					0.579	1.251
	1.332	2.798					0.588	1.276
	1.137	2.7					0.646	1.324
	0.801	5.34					0.647	1.343
	0.234	1.5					0.656	1.385
	0.789	2.371					0.658	1.442
	1.279	2.735					0.675	1.475
	0.281	2.203					0.677	1.479
	0.349	0.233					0.684	1.561
	1.658	3.329					0.687	1.566
	1.839	1.777					0.693	2
	11.632	2.225					0.713	2.162
	1.572	2.735					0.734	2.252
	1.038	1.768					0.751	2.277
	6.634	0.52					0.76	2.347
	3.861	0.75					0.782	2.372
	1.806	2.106					0.795	2.53
	2.151	2.144					0.808	2.748
	1.663	1.84					0.811	3.795
	0.445	0.936					0.837	4.156
	0.262	0.792					0.866	4.698
	1.354	1.851					0.898	4.921
	1.104	16.724					0.914	5.194
	0.64	0.465					0.926	9.029
	2.183	1.677					0.943	16.181
	1.71	0.838					0.957	0.088
	0.766	3.64					1.026	0.127
	1.537	4.114					1.063	0.209
	2.374	3.001					1.103	0.233
	4.105	2.374					1.156	0.252
	0.551	2.958					1.227	0.263
	0.872	1.851					1.237	0.282
	0.398	1.584					1.284	0.294
	1.03	1.851					1.295	0.296
	4.25	1.265					1.315	0.313
	1.046	1.976					1.342	0.329
	2.409	0.838					1.364	0.332
	0.691	2.394					1.376	0.333
	1.688	4.162					1.385	0.333
	9.026	0.812					1.416	0.343
	7.024	5.515					1.454	0.353
	3.759	1.56					1.506	0.354
	0.856	2.889					1.658	0.383
	1.599	3.486					1.701	0.387
	0.978	4.365					1.709	0.389
	2.888	4.214					1.716	0.4
	2.658	1.414					1.817	0.402
	2.429	3.203					1.843	0.41
	3.679	8.394					1.891	0.421
	1.273	3.102					1.928	0.434
	0.36	9.767					1.964	0.437
	0.942	1.843					2.164	0.441
	3.545	1.149					2.248	0.443
	0.819	1.614					2.373	0.484
	1.159	4.098					2.381	0.494
	1.092	2.928					2.684	0.5
	3.918	2.019					3.137	0.52
	1.918	9.147					3.138	0.524
	1.296	0.53					3.424	0.526
	1.19	1.715					4.034	0.606
	2.259	1.883					4.193	0.625
	14	1.843					0.178	0.651
	12.181	1.706					0.186	0.691
	2.163	4.086					0.196	0.691
	0.891	2.928					0.237	0.711
	0.842	0.52					0.237	0.711
	1.139	4.263					0.243	0.721
	1.369	4.263					0.251	0.728
	1.579	2.465					0.251	0.771
	4.113	4.156					0.254	0.811
	4.885	1.973					0.271	0.815
	2.763	2.722					0.279	0.82
	2.11	9.79					0.309	0.845
	4.181	0.858					0.325	0.855
	4.77	6.585					0.329	0.915
	0.757	3.869					0.344	0.931
	0.609	3.931					0.344	0.942
	0.609	5.752					0.355	1.004
	0.663	3.31					0.384	1.02
	0.415	2.838					0.421	1.132
	0.823	3.785					0.437	1.153
	3.331	4.046					0.447	1.156
	2.983	18.516					0.447	1.171
	1.286	2.515					0.458	1.18
	2.602	2.141					0.465	1.186
	3.852	3.406					0.475	1.201
	0.525	2.281					0.487	1.246
	0.742	2.271					0.494	1.266
	0.525	15.319					0.509	1.286
	3.611	2.492					0.516	1.297
	1.188	1.5					0.52	1.367
	3.821	5.6					0.559	1.465
	1.221	1.801					0.56	1.544
	2.25	0.455					0.562	1.604
	0.53	0.455					0.583	1.691
	0.474	0.42					0.603	1.787
	3.343	0.78					0.626	1.814
	2.942	24.832					0.635	1.959
	1.125	42.76					0.645	2.022
	1.709	5.517					0.653	2.3
	1.924	1.834					0.671	2.693
	0.422	0.941					0.677	2.722
	0.507	1.99					0.698	2.875
	0.558	1.71					0.698	2.888
	1.292	1.093					0.717	3.309
	5.274	2.512					0.75	3.963
	14.273	0.707					0.757	6.387
	10.837	0.542					0.844	6.455
	30.885	0.449					0.85	6.871
	5.57	1.098					0.898	8.591
	2.041	0.508					0.903	10.13
	1.988	1.906					0.903	0.212
	0.78	2.782					0.96	0.225
	1.125	0.571					0.967	0.253
	1.579	1.733					0.998	0.257
	0.624	0.398					1.042	0.321
	5.074	0.468					1.05	0.321
	1.125	1.93					1.081	0.332
	2.107	1.142					1.086	0.349
	2.093	0.9					1.153	0.349
	1.778	1.014					1.182	0.356
	1.045	1.079					1.23	0.38
	0.515	1.171					1.256	0.383
	0.31	1.572					1.259	0.383
	0.329	1.256					1.269	0.406
	0.449	1.441					1.322	0.419
	0.689	0.753					1.427	0.424
	0.609	1.235					1.54	0.499
	1.4	0.29					1.591	0.5
	0.744	0.525					1.638	0.529
	0.84	1.155					1.779	0.542
	4.156	1.48					1.974	0.545
	3.98	1.44					2.01	0.547
	1.478	0.368					2.018	0.566
	1.677	2.511					2.294	0.575
	2.578	1.839					2.693	0.6
	1.775	0.41					3.081	0.603
	1.516	0.789					3.129	0.615
	0.91	4.637					3.164	0.624
	0.626	0.736					3.177	0.658
	0.7	1.535					3.548	0.673
	0.214	3.34					4.018	0.686
	0.581	3.608					4.251	0.689
	0.562	1.532					4.833	0.707
	0.812	1.152					5.075	0.708
	0.609	0.567					5.59	0.726
	1.188	0.887					6.176	0.75
	1.56	0.671					21.072	0.795
	1.457	1.57					0.208	0.849
	7.207	3.271					0.212	0.9
	2.869	3.628					0.221	0.918
	1.154	1.474					0.222	1.005
	1.186	0.463					0.223	1.006
	2.73	0.532					0.233	1.049
	3.111	0.472					0.247	1.111
	5.713	0.87					0.253	1.131
	2.279	1.13					0.256	1.174
	1.5	1.131					0.261	1.192
	2.64	0.472					0.271	1.213
	3.362	0.341					0.289	1.248
	0.773	1.331					0.312	1.304
	0.479	2.5					0.325	1.332
	1.236	2.298					0.329	1.53
	1.728	3.287					0.341	1.545
	2.424	0.66					0.353	1.601
	10.002	0.271					0.356	1.647
	5.691	0.879					0.356	1.766
	3.49	0.41					0.376	1.929
	2.351	0.401					0.383	1.962
	0.441	2.007					0.389	1.987
	0.722	2.885					0.41	2.014
	0.768	1.115					0.416	2.074
	1	2.388					0.428	2.132
	1.27	2.338					0.431	2.149
	0.28	0.705					0.447	2.151
	0.477	0.445					0.465	2.397
	0.488	0.47					0.475	2.43
	1.309	0.905					0.478	2.458
	0.443	5.459					0.493	2.528
	1.373	0.976					0.515	2.615
	1.342	1.393					0.521	2.686
	1.746	8.622					0.546	2.7
	0.479	4.455					0.552	2.788
	0.652	3.155					0.58	2.788
	1.852	0.445					0.585	3.184
	2.962	0.441					0.606	3.243
	1.898	0.297					0.618	3.574
	3.149	1.061					0.629	3.619
	0.756	0.53					0.629	3.656
	0.393	1.194					0.648	3.997
	0.56	0.625					0.656	4.551
	1.3	1.211					0.665	4.551
	1.337	4.36					0.673	4.687
	0.801	2.828					0.728	4.92
	0.682	0.804					0.751	5.426
	1.041	2.041					0.754	5.551
	0.536	3.632					0.783	5.841
	2.337	1.125					0.813	6.125
	3.886	1.073					0.819	6.934
	1.68	0.422					0.829	9.182
	1.076	1.605					0.888	0.157
	1.209	1.209					0.894	0.263
	0.768	0.698					0.894	0.276
	0.361	1.553					0.924	0.281
	1.497	7.887					0.969	0.333
	9.115	3.85					0.998	0.354
	6.003	0.949					1.021	0.356
	2.649	3.556					1.026	0.364
	4.01	2.608					1.044	0.368
	2.112	0.682					1.052	0.387
	18.61	0.368					1.09	0.394
	3.585	0.47					1.108	0.412
	3.978	0.297					1.147	0.441
	3.946	0.635					1.195	0.441
	2.251	0.445					1.209	0.45
	2.479	0.47					1.27	0.456
	1.152	1.109					1.316	0.465
	0.562	14.008					1.319	0.472
	0.551	3.096					1.368	0.474
	0.987	4.544					1.402	0.475
	3.504	14.228					1.442	0.49
	6.281	6.729					1.444	0.508
	0.676	8.162					1.478	0.517
	1.265	5.96					1.577	0.542
	1.644	3.557					1.641	0.542
	3.127	4.337					1.675	0.546
	0.885	3.478					1.886	0.577
	1.4	5.021					1.991	0.579
	0.989	6.234					2.04	0.589
	1.829	1.279					2.075	0.64
	0.92	0.551					2.152	0.663
	0.349	1.712					2.741	0.666
	0.396	0.281					2.811	0.668
	0.26	1.342					3.552	0.671
	3.265	1.19					3.617	0.701
	1.029	3.229					3.627	0.731
	4.094	3.058					3.693	0.736
	2.023	4.556					3.708	0.776
	2.284	0.999					3.786	0.789
	0.609	3.732					4.081	0.817
	3.284	2.403					6.36	0.842
	2.06	4.653					0.208	0.86
	0.694	2.448					0.208	0.887
	0.739	6.516					0.224	0.888
	0.724	4.578					0.253	0.903
	0.739	0.499					0.268	0.923
	0.676	0.281					0.279	0.927
	0.728	0.768					0.3	0.931
	1.644	0.562					0.3	0.955
	0.908	0.736					0.3	0.981
	0.888	4.461					0.332	0.988
	0.581	0.629					0.335	1.006
	2.936	4.543					0.335	1.018
	11.487	3.605					0.358	1.023
	4.398	0.281					0.377	1.052
	2.038	1.049					0.38	1.099
	0.792	1.213					0.383	1.103
	1.356	0.844					0.395	1.134
	0.722	0.784					0.428	1.137
	1.025	0.629					0.448	1.186
	2.225	1.765					0.465	1.192
	2.186	1.71					0.471	1.209
	1.361	0.499					0.485	1.211
	0.368	3.167					0.503	1.272
	0.406	0.795					0.503	1.428
	0.698	0.174					0.503	1.48
	1.258	0.74					0.537	1.489
	0.838	0.551					0.542	1.557
	0.303	2.231					0.553	1.667
	1.968	0.643					0.558	1.712
	0.468	1.25					0.558	1.718
	1.176	3.454					0.566	1.774
	0.822	0.594					0.578	1.809
	2.29	2.912					0.596	2.054
	0.722	1.086					0.6	2.059
	0.658	0.91					0.6	2.072
	1.667	3.825					0.6	2.359
	2.184	2.122					0.6	2.544
	0.47	4.711					0.614	3.182
	1.147	1.103					0.651	4.606
	1.951	2.376					0.682	8.077
	0.872	2.764					0.686	8.097
	2.337	6.501					0.706	8.334
	3.682	1.27					0.706	10.262
	0.698	5.448					0.716	25.136
	0.281	2.497					0.751	0.203
	0.445	1.083					0.759	0.234
	0.719	0.629					0.774	0.261
	1.248	0.671					0.785	0.28
	1.482	0.349					0.789	0.296
	1.485	1.782					0.795	0.298
	0.474	0.42					0.795	0.298
	0.719	0.643					0.799	0.329
	0.91	1.014					0.803	0.335
	1.093	7.969					0.817	0.339
	0.64	1.26					0.819	0.363
	1.688	0.629					0.873	0.391
	1.374	1.324					0.896	0.401
	1.275	2.944					0.961	0.434
	0.47	0.635					0.972	0.458
	0.946	0.52					0.972	0.515
	1.473	1.563					0.979	0.579
	2.796	2.86					0.989	0.646
	0.849	1.304					0.993	0.651
	0.895	0.633					1.013	0.652
	0.505	2.257					1.015	0.68
	1.218	1.48					1.108	0.681
	0.885	0.757					1.124	0.706
	1.255	2					1.132	0.748
	21.515	2.434					1.136	0.75
	6.61	0.588					1.156	0.784
	13.594	5.765					1.156	0.792
	13.714	0.56					1.181	0.8
	11.17	0.406					1.191	0.84
	4.618	1.071					1.196	0.921
	2.206	0.349					1.2	0.921
	0.812	1.258					1.267	0.923
	1.912	8.515					1.315	0.935
	0.658	12.945					1.315	0.943
	0.829	16.665					1.358	1.06
	0.551	7.906					1.395	1.096
	0.706	1.587					1.424	1.132
	0.499	0.707					1.431	1.155
	1.438	0.56					1.467	1.231
	2.537	0.333					1.471	1.237
	1.608	3.649					1.536	1.284
	2.985	12.599					1.54	1.308
	4.044	0.872					1.544	1.314
	2.122	1.602					1.559	1.346
	4.907	3.564					1.561	1.373
	2.485	1.036					1.598	1.438
	1.269	0.628					1.636	1.624
	0.429	0.329					1.674	1.643
	0.956	0.164					1.81	1.68
	0.368	1.572					1.815	1.706
	1.113	0.744					1.897	1.748
	1.501	0.312					1.969	1.776
	1.188	2.767					1.972	1.912
	0.846	2.279					2.118	1.97
	3.589	1.489					2.149	1.975
	0.609	1.14					2.277	2.228
	0.329	7.589					2.496	2.391
	6.85	5.057					2.611	2.42
	6.141	2.093					2.783	2.538
	1.374	2.909					3	2.63
	0.908	1.529					3.152	2.676
	0.814	2.183					3.502	2.736
	0.838	1.324					3.703	2.951
	0.678	2.208					3.755	3.398
	0.588	3.652					3.8	3.557
	3.009	0.663					6.992	3.579
	1.022	0.455					14.09	4.878
	16.996	1.525					20.446	6.622
	1.846	0.823					0.159	13.633
	1.025	5.034					0.197	20.9
	2.207	4.699					0.206	34.57
	5.794	2.068					0.243	0.209
	1.917	1.117					0.25	0.25
	1.154	0.719					0.25	0.3
	0.429	2.691					0.252	0.312
	0.885	1.215					0.254	0.318
	0.28	1.211					0.274	0.343
	1.041	1.404					0.307	0.349
	1.213	1.356					0.31	0.356
	0.853	0.861					0.312	0.374
	1.584	1.603					0.324	0.376
	1.291	1.468					0.372	0.376
	2.322	2.146					0.377	0.381
	1.361	1.136					0.38	0.4
	2.657	1.737					0.382	0.419
	0.406	1.718					0.397	0.42
	0.628	0.95					0.424	0.45
	3.009	0.88					0.454	0.454
	1.875	2.286					0.454	0.468
	1.54	5.07					0.461	0.503
	1.275	2.081					0.484	0.503
	0.515	0.888					0.49	0.512
	1.717	1.923					0.503	0.531
	2.625	6.454					0.508	0.533
	0.441	0.546					0.523	0.545
	13.148	0.364					0.533	0.565
	5.907	2.029					0.541	0.582
	2.354	2.23					0.558	0.583
	4.746	1.048					0.56	0.589
	0.882	0.406					0.565	0.618
	1.45	0.938					0.574	0.618
	1.563	1.407					0.596	0.64
	0.787	0.81					0.599	0.643
	1.053	0.652					0.613	0.655
	0.959	0.303					0.634	0.684
	2.257	0.354					0.636	0.687
	1.719	1.248					0.637	0.689
	1.365	0.979					0.653	0.689
	2.421	1.004					0.663	0.701
	3.721	2.73					0.698	0.712
	7.721	0.652					0.698	0.718
	1.878	2.186					0.723	0.749
	2.245	0.368					0.731	0.751
	1.516	0.411					0.79	0.77
	0.885	1.238					0.8	0.813
	5.208	1.091					0.803	0.84
	3.203	0.646					0.816	0.874
	2.49	1.488					0.837	0.882
	0.512	0.187					0.926	0.907
	1.032	1.77					0.928	0.918
	1.536	3.89					0.944	0.955
	1.471	4.647					0.999	0.975
	1.072	0.429					1.046	0.999
	0.954	1.673					1.248	1.046
	0.419	0.593					1.303	1.052
	0.744	0.744					1.303	1.056
	41.203	2.336					1.5	1.059
	6.001	0.629					1.508	1.067
	16.641	0.65					1.53	1.067
	23.194	1.069					1.621	1.081
	13.576	0.861					1.703	1.087
	5.002	1.092					1.705	1.134
	1.163	11.711					1.787	1.136
	2.134	11.294					1.959	1.169
	1.324	11.793					1.97	1.172
	2.064	1.438					2.03	1.181
	2.838	14.049					2.125	1.27
	1.395	4.639					2.376	1.322
	9.361	2.304					2.49	1.402
	19.206	2.408					2.496	1.455
	11.693	0.505					2.684	1.536
	1.677	0.257					2.9	1.541
	5.121	0.436					3.047	1.544
	1.335	0.391					3.683	1.565
	4.183	1.775					3.946	1.567
	1.495	1.893					3.997	1.568
	3.404	1.521					7.148	1.604
	1.242	0.533					12.225	1.638
	1.125	1.745					26.49	1.703
	1.357	0.443					39.972	1.74
	1.971	1.168					0.25	1.75
	1.013	0.423					0.25	1.899
	1.441	0.518					0.257	2.007
	0.497	0.937					0.279	2.013
	1.149	0.884					0.279	2.218
	0.829	1.338					0.333	2.233
	1.446	2.025					0.343	2.282
	1.458	0.626					0.364	2.392
	3.33	1.775					0.374	2.408
	0.463	0.745					0.383	2.437
	2.246	0.417					0.395	2.496
	3.519	0.792					0.424	2.589
	1.838	3.274					0.447	2.718
	0.702	3.376					0.487	2.721
	0.806	0.725					0.499	2.747
	2.733	0.541					0.501	2.934
	2.014	0.571					0.503	3.282
	1.07	1.69					0.503	3.768
	1.299	0.99					0.529	3.871
	0.946	0.609					0.537	4.056
	1.121	2.428					0.545	4.388
	1.235	1.382					0.558	4.519
	0.837	1.183					0.558	4.896
	1.588	0.919					0.584	5.663
	3.235	0.928					0.589	5.974
	1.786	0.556					0.627	7.266
	0.629	0.398					0.643	9.08
	0.965	1.108					0.681	10.304
	2.808	3.354					0.686	12.237
	0.942	0.536					0.691	0.294
	1.326	0.543					0.698	0.317
	1.327	1.082					0.716	0.383
	0.573	0.515					0.73	0.458
	0.922	0.423					0.744	0.465
	2.76	0.939					0.759	0.465
	1.202	0.203					0.767	0.499
	1.362	0.62					0.775	0.501
	0.606	0.515					0.799	0.537
	2.67	1.048					0.799	0.582
	1.086	1.421					0.809	0.606
	0.88	2.004					0.856	0.614
	1.791	0.728					0.867	0.618
	0.68	0.5					0.884	0.624
	0.782	0.723					0.898	0.627
	3.055	1.029					0.9	0.658
	0.926	0.666					0.97	0.658
	3.302	1.71					1.016	0.728
	6.089	0.463					1.023	0.759
	2.843	0.447					1.056	0.789
	2.394	0.822					1.082	0.799
	0.664	1.116					1.105	0.832
	0.245	1.716					1.119	0.832
	1.333	1.432					1.145	0.869
	0.221	0.505					1.156	0.908
	2.646	0.754					1.218	0.913
	1.107	5.262					1.258	1.008
	1.372	0.808					1.342	1.041
	1.268	0.663					1.35	1.101
	1.674	0.454					1.37	1.125
	3.926	1.693					1.454	1.132
	0.893	0.866					1.493	1.15
	0.898	0.629					1.507	1.177
	1.641	0.644					1.544	1.178
	5.14	2.934					1.674	1.182
	6.658	1.204					1.687	1.2
	1.404	1.389					1.73	1.258
	0.971	1.974					1.814	1.263
	0.826	0.426					1.983	1.322
	2.486	0.35					2.122	1.341
	0.893	6.401					2.309	1.408
	0.814	0.883					2.415	1.455
	2.105	1.048					2.803	1.599
	0.573	1.271					2.846	1.664
	0.816	0.515					3.059	1.72
	2.851	0.57					3.468	1.812
	0.646	0.57					3.806	1.829
	0.354	0.369					4.642	1.885
	0.85	0.589					5.418	1.935
	0.574	12.597					6.575	1.953
	1.542	5.025					7.621	2.037
	2.458	3.058					15.789	2.093
	10.255	2.892					0.235	2.13
	43.147	0.491					0.25	2.262
	31.879	3.736					0.253	2.319
	2.207	1.659					0.257	2.452
	1.432	0.953					0.3	2.475
	7.355	1.756					0.3	2.648
	0.969	0.502					0.333	2.694
	0.93	0.397					0.343	2.863
	0.415	1.039					0.377	2.906
	0.455	0.404					0.377	2.913
	1.633	1.017					0.41	2.966
	0.78	0.823					0.416	3.052
	0.551	0.304					0.434	3.17
	1.115	6.959					0.441	3.348
	6.587	5.19					0.45	3.523
	1.224	1.362					0.454	3.599
	0.855	0.776					0.474	3.939
	0.441	14.354					0.485	3.941
	0.914	11.289					0.499	4.06
	1.024	25.848					0.506	4.195
	1.833	27.661					0.526	4.853
	2.634	12.21					0.529	5.284
	2.815	2.658					0.533	5.342
	5.636	2.348					0.542	5.36
	1.131	2.558					0.575	5.415
	2.322	0.728					0.584	5.417
	4.37	7.513					0.596	6.753
	3.342	2.756					0.596	8.032
	2.448	0.814					0.6	8.053
	1.603	1.858					0.624	9.733
	0.384	1.599					0.629	14.482
	0.314	0.987					0.636	0.221
	0.305	0.714					0.65	0.23
	0.691	0.26					0.65	0.25
	1.954	0.839					0.671	0.298
	0.493	1.14					0.671	0.326
	0.757	0.699					0.686	0.359
	3.246	1.014					0.692	0.376
	1.803	2.212					0.744	0.376
	0.837	1.291					0.765	0.376
	1.492	0.93					0.826	0.381
	2.863	0.245					0.829	0.404
	0.745	0.39					0.858	0.41
	3.874	2.603					0.877	0.454
	1.023	3.279					0.924	0.475
	1.105	0.768					0.97	0.476
	0.443	3.126					0.971	0.5
	0.362	6.991					0.977	0.503
	0.865	0.81					0.979	0.537
	0.901	0.977					0.998	0.555
	3.094	0.837					1.002	0.562
	0.674	3.364					1.125	0.565
	0.772	1.747					1.182	0.565
	1.593	1.536					1.211	0.583
	1.969	1.654					1.281	0.586
	0.553	1.514					1.332	0.593
	2.863	0.423					1.341	0.605
	0.954	0.759					1.364	0.606
	0.739	0.625					1.514	0.631
	1.133	1.712					1.827	0.633
	0.397	1.912					1.835	0.637
	0.573	0.164					1.937	0.64
	1.147	0.369					1.977	0.643
	0.866	0.526					2.085	0.651
	0.556	0.896					2.119	0.658
	1.261	0.81					2.125	0.658
	1.632	0.782					2.301	0.661
	2.756	2.33					2.592	0.682
	0.593	1.048					2.69	0.691
	0.562	3.36					2.771	0.701
	1.096	1.587					2.968	0.724
	1.418	2.065					3.181	0.78
	2.628	3.905					3.355	0.791
	1.024	4.705					3.853	0.795
	1.072	16.608					4.202	0.849
	1.422	4.559					4.478	0.849
	1.328	1.067					4.495	0.87
	0.625	1.349					4.53	0.975
	0.397	2.164					5.262	1.006
	0.491	0.721					6.582	1.056
	0.722	1.638					6.977	1.09
	1.088	8.446					7.054	1.119
	2.302	3.902					8.86	1.13
	3.026	1.608					11.471	1.163
	0.826	0.479					0.168	1.178
	2.03	1.407					0.168	1.206
	5.505	0.35					0.209	1.242
	0.411	2.083					0.225	1.247
	1.525	1.04					0.225	1.256
	2.386	2.823					0.227	1.263
	1.949	1.163					0.238	1.294
	1.233	0.883					0.244	1.298
	0.872	1.934					0.252	1.312
	0.593	1.397					0.252	1.442
	1.628	0.62					0.268	1.473
	0.628	0.85					0.279	1.494
	0.772	0.593					0.309	1.512
	0.787	0.938					0.321	1.664
	0.616	0.791					0.335	1.7
	2.06	1.874					0.337	1.707
	0.589	0.698					0.365	1.756
	0.478	1.111					0.374	1.81
	0.846	2.336					0.424	1.847
	0.772	1.824					0.45	1.925
	2.935	3.513					0.454	2.271
	0.671	0.443					0.461	2.275
	0.739	0.768					0.465	3.031
	0.364	0.589					0.469	3.063
	0.626	1.14					0.485	3.117
	10.589	0.656					0.508	3.216
	2.211	0.404					0.512	3.591
	10.441	1.338					0.516	4.262
	2.134	1.604					0.555	5.017
	1.875	2.545					0.588	5.551
	10.147	1.893					0.643	5.916
	0.441	0.52					0.655	6.84
	2.122	1.089					0.661	7.271
	2.437	1.998					0.672
	0.419	1.238					0.673
	0.609	6.786					0.677
	0.794	2.684					0.707
	0.221	2.319					0.717
	0.735	5.129					0.734
	0.553	1.382					0.797
	0.52	2.965					0.804
	0.379	2.686					0.811
	2.099	0.926					0.838
	0.396	2					0.839
	8.878	2.437					0.866
	1.091	5.938					0.869
	1.091	2.984					0.874
	1.495	7.209					0.905
	1.051	7.436					0.999
	0.909	6.507					1.005
	1.428	1.687					1.231
	1.214	2.764					1.254
	0.271	1.985					1.304
	0.347	1.361					1.423
	7.606	3.552					1.465
	1.875	3.124					1.549
	3.151	1.186					1.558
	1.89	1.973					1.591
	0.759	1.2					1.637
	0.938	3.172					1.679
	1.501	2.758					1.68
	0.335	6.347					1.692
	0.499	9.236					1.707
	0.709	0.471					1.745
	10.207	0.963					1.766
	4.096	2.233					1.881
	1.186	3.415					2.094
	0.279	1.186					2.28
	1.158	2.306					2.407
	0.241	1.731					2.772
	1.006	1.543					2.876
	0.814	1.088					2.988
	4.862	3.633					3.073
	1.284	1.611					5.78
	4.894	7.399					6.46
	0.525	1.971					6.75
	3.807	0.891					8.774
	0.542	0.827					9.792
	0.377	0.671					10.808
	1.616	2.925					16.024
	2.536	3.515
	2.599	2.042
	0.493	2.174
	0.308	6.027
	0.731	5.432
	2.465	1.917
	6.377	1.115
	6.377	0.716
	1.079	1.76
	0.375	7.995
	0.677	1.505
	10.353	0.681
	1.841	0.994
	0.732	2.228
	0.882	2.239
	1.695	2.371
	0.525	0.489
	0.934	0.698
	1.767	0.554
	1.18	2.343
	0.422	1.17
	0.622	1.283
	0.663	0.474
	2.854	0.422
	3.147	1.947
	0.542	4.143
	1.535	3.214
	0.559	10.124
	1.17	1.253
	1.341	6.983
	2.846	1.335
	0.411	2.897
	0.47	0.859
	6.157	1.032
	3.459	2.058
	11.657	1.36
	1.06	2.578
	1.098	2.734
	0.58	1.953
	0.379	0.312
	0.926	1.026
	1.368	1.34
	1.848	0.749
	2.047	3.36
	1.184	0.42
	0.394	0.671
	0.487	0.993
	1.137	2.652
	1.096	1.179
	12.942	1.731
	6.914	0.863
	9.887	1.92
	8.427	0.757
	5.832	6.305
	27.791	0.69
	3.16	31.707
	1.649	4.103
	1.484	2.028
	2.356	3.557
	4.329	9.255
	2.084	1.186
	0.441	11.628
	0.977	0.329
	0.768	2.394
	0.331	1.029
	0.281	1.775
	0.904	2.257
	0.551	1.04
	1.258	2.319
	0.305	0.722
	1.755	1.558
	1.608	0.349
	1.296	0.329
	0.742	0.233
	0.586	1.68
	3.339	0.633
	2.173	0.865
	1.854	1.434
	0.88	0.834
	4.983	3.721
	2.581	1.425
	1.041	4.045
	1.809	6.336
	0.978	1.478
	0.554	0.808
	1.291	0.316
	1.204	0.971
	0.42	1.428
	2.36	1.731
	2.099	0.806
	0.858	0.663
	0.904	0.523
	5.39	0.698
	1.828	0.822
	1.95	0.65
	0.39	0.505
	5.086	0.692
	10.427	2.66
	3.476	1.563
	4.221	0.942
	1.076	12.5
	0.643	1.255
	0.489	1.451
	0.53	0.499
	0.297	1.861
	1.495	1.308
	1.248	1.086
	0.645	0.521
	0.855	2.346
	1.287	0.551
	0.445	0.354
	1.841	0.682
	1.076	2.656
	0.586	1.084
	0.496	1.041
	1.04	0.725
	0.896	0.872
	0.316	0.398
	0.791	0.554
	0.379	0.392
	1.925	0.691
	0.919	4.638
	2.058	3.072
	0.723	1.081
	0.593	1.64
	0.411	3.77
	0.702	1.248
	0.629	0.804
	0.62	4.029
	1.129	5.007
	1.859	2.024
	5.733	9.013
	1.432	1.331
	3.106	1.629
	0.53	1.818
	0.782	0.52
	1.9	1.409
	0.368	0.429
	0.847	0.47
	2.263	0.568
	1.785	2.936
	0.317	0.937
	0.415	2.931
	3.167	0.195
	4.727	0.262
	0.687	4.23
	0.487	4.726
	1.036	1.506
	1.691	8.858
	0.641	1.311
	0.499	0.595
		0.939
		1.108
		0.273
		0.663
		0.554
		0.976
		2.578
		1.448
