# Supplementary material for: Brain-specific Drp1 regulates postsynaptic endocytosis and dendrite formation independently of mitochondrial division
Source: eLife. 2019 Oct 11;8:e44739. doi: 10.7554/eLife.44739 (PMC6824841; doi:10.7554/eLife.44739)
Supplement: Figure 4—figure supplement 3—source data 1. [file elife-44739-fig4-figsupp3-data1.xlsx]

## Sheet: Fig4-S3
Figure 4—figure supplement 3A
Open field test
Locomoter activity			Anxiety
Total activity			Time spend (%) in the central and perioheral regions
WT	KO		WT		KO
4298	4113		Central	Peripheral	Central	Peripheral
3125	4611		2096	2152	2099	2039
4325	3584		1930	1648	2198	1568
5254	3747		2379	1633	1976	2137
3349	3679		2265	1170	2590	2021
3052	4297		1813	1770	1521	2063
3572	4631		1536	2161	1617	2130
3365	4138		1883	1498	1360	2319
4248	3766		2711	1860	1938	2359
3578	3356		1868	2430	2141	2490
4012	2453		822	2303	1426	2249
3435	3744		1960	2365	2032	1290
3583	4283		2873	2381	1491	1310
3697	2971		1882	1467	1641	1378
3381	5357		1521	1531	1243	1805
4571	2858		1104	2468	1862	1586
3931	3534		1509	1856	2158	1980
4064	3239		2424	1404	2455	1474
3766	3322		2033	1647	1495	1485
2917	2801		2851	1306	759	1694
4367	3019		1217	1780	1509	2235
3770	3048		2055	1876	2089	2194
3828	3448		1741	2323	1071	1900
3680	4138		1519	2247	2046	3311
4157	3929		723	2194	1250	1608
2997	2980		2030	2337	1429	2105
			1804	1966	1135	2104
Figure 4—figure supplement 3B
Y-maze tests
Locomoter activity			Working memory			Spacial recognition memory
Number of arm entries			Spontaneous alternation (%)			Time in norvel arm (sec)
WT	KO		WT	KO		WT	KO
22	25		0.818182	0.56		113.8	68.4
26	29		0.538462	0.689655		125.4	86.4
27	31		0.592593	0.612903		68.4	126
32	33		0.65625	0.515152		55.8	74.2
24	19		0.541667	0.631579		80.9	64
25	32		0.56	0.625		85.2	168.4
38	17		0.552632	0.823529		73.8	67.3
29	25		0.586207	0.56		114.9	134.4
22	24		0.5	0.708333		37.5	48.8
33	29		0.515152	0.758621		65.6	98.6
36	23		0.75	0.73913		0	124.1
20	23		0.6	0.478261		35.6	65
30	27		0.633333	0.592593		93.9	31.6
23	32		0.608696	0.5		82	70
20	35		0.75	0.571429		67.2	83.8
22	31		0.545455	0.580645		68.7	62.1
33	31		0.727273	0.516129		66.7	136.8
32	29		0.53125	0.655172		81.7	61.5
20	33		0.4	0.606061		96.9	17.6
38	26		0.710526	0.5		92	68.9
30	35		0.6	0.6		67	97.6
35	39		0.714286	0.512821		113.2	107.5
26	31		0.807692	0.516129		95.6	74.5
30	31		0.7	0.516129		81.6	103.4
24	20		0.458333	0.75		226.3	75.8
40	35		0.475	0.514286		109.3	121.4
Figure 4—figure supplement 3C
Rotarod test
Motor coordination
Mean latency (sec)
WT	KO
81.6667	78.6667
105.667	102.667
81.3333	68.3333
71.6667	40.6667
66	74.3333
37.6667	82.3333
55	81.6667
39.6667	57.3333
79	68.3333
56.3333	35.3333
86	95
52.6667	88
80	116.667
81	61.3333
93.3333	110
59.6667	57.3333
65.6667	81.3333
106	91.6667
55.3333	96
74.3333	62.6667
90	48.3333
92	70
115.333	83
96.3333	69.6667
70.3333	51.3333
87.6667	46.6667
Figure 4—figure supplement 3D
Elevated plus maze test
Anxiety
Time in open arm (sec)
WT	KO
41.2	36.2
52.5	115.3
80.4	24.7
68.2	63.8
75.9	79.3
18	76.9
100.3	42.6
45.4	78
91.1	16.6
75.5	58.1
23.4	50
34.7	28.5
31.3	23
7.9	44.8
6.2	82.9
17.5	22.9
39.3	0
6.1	42.2
18.2	60.5
23	36.2
7.5	51
3.5	84.1
10.3	91.6
162.2	39.4
70.5	56.7
66.5	16.9
