# Supplementary material for: Brain-specific Drp1 regulates postsynaptic endocytosis and dendrite formation independently of mitochondrial division
Source: eLife. 2019 Oct 11;8:e44739. doi: 10.7554/eLife.44739 (PMC6824841; doi:10.7554/eLife.44739)
Supplement: Figure 4—source data 1. [file elife-44739-fig4-data1.xlsx]

## Sheet: Fig4
Figure 4B
Number of primary dendrites in WT and KO neurons (in vitro)
	WT	KO
	4	7
	12	14
	4	11
	10	11
	7	7
	7	10
	5	11
	6	9
	6	10
	3	9
	10	9
	9	9
	10	13
	6	19
	7	8
	8	13
	7	12
	11	15
	7	15
	7	11
	8	10
	6	8
	11	7
	5	10
	5	10
	9	12
	7	9
	12	10
	12	13
	6	9
	9	12
	10	10
	8	13
	11	9
	7	6
	7	12
	8	9
	11	11
	9	8
	7	11
	7	9
	6	10
	7	12
	10	10
	8	13
	9	16
	12	16
	12	8
	10	9
	5	9
	9	9
	10	6
	7	10
	9	10
	7	13
	9	11
	13	14
	9	6
	6	14
	12
Figure 4C
Number of branching per 250 µm dendrite in WT and KO neurons (in vitro)
Values are the average of 1-3 primary dendrites per neuron
	WT	KO
	3	5.66667
	4	6
	5	6.33333
	5	8.66667
	5	6
	4	5.5
	5	5
	4	5
	8	5
	6	6
	6	6.66667
	5	6.33333
	6.5	8
	8	9
	5	8
	4.5	5
	8	7
	6	6.66667
	6	7
	11	5
	7	9
	6	6
	5.5	6
	6	5.66667
	2.5	6.66667
	7	7.66667
	6	6.66667
	6	8.33333
	3	12
	2	6
	7	11
	8	8
	6	7
	6	8
	11	10
	7	3
	6	6.66667
	7.5	6
	10	9
	6	5
	6	7
	7	7
	6	6
	6	4.33333
	10	5
	8	6
	6	6
	4.5	9
	8	5
	6	12
	10	6
	4	8
	7	8
	5	6.33333
	10	4
	6	3
	4	4.66667
	4.5	4
	6	6
	8
Figure 4D
Number of spines per dendrite length (µm) in WT and KO neurons (in vitro)
	WT	KO
	1.11757	1.04489
	0.89949	0.880705
	0.832784	0.910205
	0.851305	1.05288
	0.940007	1.16617
	1.42631	1.07508
	1.04174	0.663322
	0.905185	0.93157
	1.19581	1.04839
	0.932635	0.942867
Figure 4H
Number of primary dendrites in 2 or 3 weeks primary cultured neurons
	2 weeks in vitro			3 weeks in vitro
shRNA:	Scr	AB	shRNA:	Scr	AB
	8	10		14	13
	8	8		11	13
	9	9		8	14
	9	6		8	12
	8	11		14	11
	10	6		9	13
	7	8		10	12
	7	9		9	9
	8	10		12	9
	7	13		9	8
	10	8		11	9
	7	6		10	10
	8	13		8	8
	9	8		8	8
	5	10		10	15
	7	8		10	11
	5	8		6	10
	10	10		11	12
	8	5		13	14
	8	12		9	11
	9	8		13	13
	6	13		7	13
	8	7		15	11
	9	10		11	12
	7	8		6	10
	6	13		9	12
	8	13		7	8
	8	13		9	14
	7	7		6	9
	6			9	11
				10	15
				12	12
				8	10
				9	9
				10	10
				13	20
				9	13
				13	11
				9	10
				8	8
				7	9
				12	14
				10	10
				6	10
				12	11
				10	9
				8	12
				8	9
				10	10
				10	10
Figure 4I
Number of primary dendrites in rescure analysis
shRNA:	AB	AB
Rescue:	-	ABCD
	11	7
	11	7
	8	9
	10	8
	9	6
	7	8
	13	8
	10	8
	12	13
	10	6
	11	13
	7	8
	9	9
	15	8
	7	7
	11	9
	8	9
	9	10
	9	11
	7	15
	9	7
	7	7
	13	7
	10	8
	9	10
	13	11
	10	10
	14	9
	8	9
	8	12
	8	10
	8	9
	15	8
	10	16
	8	7
	9	10
	10	11
	14	13
	7	7
	9	12
	12	12
	12	14
	8	8
	12	9
	9	11
	13	7
	13	10
	12	9
	7	11
	11	8
	10	9
	9	10
	14
	14
	13
	12
	16
	11
	10
	11
Figure 4J
Number of primary dendrites following treatment of TTX
shRNA:	Scr		AB
TTX:	-	+	-	+
	13	16	13	8
	14	8	10	11
	9	9	10	8
	10	11	8	8
	4	7	12	8
	9	15	10	12
	8	10	11	9
	7	13	9	8
	9	6	9	8
	7	5	7	11
	5	10	12	7
	9	12	14	12
	7	7	17	9
	11	7	10	9
	9	8	9	7
	13	7	16	12
	10	11	11	9
	6	10	11	10
	11	7	7	8
	17	8	8	6
	10	10	18	8
	9	4	14	10
	9	9	7	7
	9	7	8	7
	6	7	8	8
	6	12	8	10
	9	11	7	10
	8	11	6	10
	8	16	11	5
	7	10	13	7
	16	13	14	11
	15	8	13	14
	7	8	16	4
	10	7	14	9
	12	12	12	13
	11	13	15	13
	10	10	12	10
	6	7	11	15
	5	11	14	7
	10	9	12	13
	12	13	12	9
	7	8	12	11
	14	12	12	11
	7	14	11	12
	12	10	12	9
	9	10	13	7
	11	10	13	9
	10	10	9	9
	7	11	11	12
	13	10	11	10
	10	8	10	9
	5	19	12	8
	11	9	16	8
	5	7	12	8
	11	7	13	13
	10	6	10	8
	5	10	11	5
	9	14	10
	8	10	14
	7	9	15
		11	14
		5	13
		11	9
		10	11
		7	9
		8	9
		7	11
		9	11
		8	13
		9	13
		10	8
		11	8
		10	8
		13	14
		10	10
			10
			10
			10
			13
Figure 4K
Number of neurites in the hippocampus of adult mice (in vivo)
	WT	KO
	6	11
	7	5
	4	5
	5	4
	5	6
	6	10
	4	8
	4	9
	5	8
	5	5
	6	8
	5	8
	5	7
	5	7
	5	8
	7	8
	5	8
	8	8
	7	8
	6	6
	5	7
	5	7
	4	6
	6	6
	5	7
	7	5
	6	6
	6	6
	4	7
	3	7
	5	8
	7	7
	5	7
	7	6
	5	6
	6	6
	6	6
	5	6
	5	5
	5	7
	7	8
	5	7
	5	5
	4	8
	6	6
	4	6
	3	8
	6	6
	7	8
	6	8
	8	8
	6	9
	6	7
	5	8
	4	8
	4	4
	5	7
	3	8
	5	6
	7	7
	7	7
	4	6
	7	5
	5	7
	5	10
	7	7
	6	4
	6	7
	6	6
	5	5
	4	8
	6	8
	5	5
	6	5
	6	4
	5	6
	6	7
	8	7
	7	7
	4	7
	4	5
	6	5
	6	8
	5	7
	5	5
	6	6
	5	6
	7	5
	5	8
	7	6
Figure 4L
Number of primary neurites in cortex of adult mice (in vivo)
	WT	KO
	8	11
	8	10
	7	9
	5	10
	7	9
	10	8
	5	9
	9	6
	7	6
	9	10
	8	9
	8	8
	8	11
	9	8
	7	7
	8	8
	9	8
	8	11
	8	10
	10	9
	5	9
	9	11
	6	8
	7	8
	9	10
	9	8
	7	8
	6	7
	9	8
	6	10
	8	16
	10	13
	9	13
	9	12
	7	10
	8	13
	11	7
	8	9
	7	8
	9	7
	8	11
	10	9
	9	9
	8	9
	5	7
	8	9
	7	7
	8	9
	8	7
	9	9
	7	8
	9	7
	6	11
	6	10
	5	8
	8	16
	10	10
	6	9
	11	7
	10	11
	10	9
	7	6
	11	9
	8	8
	9	9
	10	8
	10	7
	9	9
	7	11
	7	9
	10	9
	9	8
	8	11
	8	8
	8	10
	7	10
	6	10
	9	9
	8	12
	9	10
	7	10
	7	11
	12	7
	10	11
	6	10
	8	8
	6	6
	8	9
	6	7
	10	10
Figure 4N
Number of primary neurites in hippocampus of 7 weeks old mice (in utero electroporation)
shRNA:	Scr	AB
	5	6
	6	7
	6	6
	4	3
	4	5
	4	7
	6	6
	6	6
	6	5
	5	6
	6	6
	6	7
	5	6
	4	7
	6	5
	6	9
	7	5
	5	7
	5	8
	7	6
	7	5
	5	9
	5	7
	6	5
	6	5
	6	7
	6	8
	6	5
	5	8
	5	7
	7	6
	6	4
	6	6
	4	6
	4	4
	6	7
	5	6
	5	5
	5	5
	3	8
	5	5
	6	7
	4	8
	4	7
	5	6
	4	6
	3	7
	5	5
	6	7
	6	6
	5	8
		5
		8
		5
		4
		6
Figure 4O
Startle response in PPI test
	WT	KO
	47.4	126.3
	66.7	160.5
	77.5	51.4
	36.3	147.7
	93.4	475.6
	92.0667	324.1
	40.8667	203.033
	461.767	149.733
	1091.37	392.167
	403.933	237
	264.933	66.3333
	53.4667	76.0667
		270.8
		107.6
Figure 4P
Inhibition rate (%) in PPI test
	WT				KO
Prepulse:	pp74	pp78	pp82	Prepulse:	pp74	pp78	pp82
	38.4669	48.3122	26.1603		65.6992	59.4987	65.1715
	35.25	48.75	53.5		48.2759	61.3627	77.5654
	23.4079	48.58	31.5835		26.07	57.1984	49.0921
	18.8073	41.7431	37.156		39.4179	48.7816	63.1092
	65.025	34.5111	67.1663		44.7365	45.7527	46.1032
	38.3048	39.2814	70.8628		53.5929	61.5008	60.4346
	22.3429	8.73745	-2.02901		77.5567	85.0919	82.254
	43.9104	53.4374	61.4095		58.7305	71.0617	61.1651
	18.0409	15.2394	20.1701		31.3495	23.5344	30.9962
	44.174	53.2514	48.4238		68.1435	60.4782	53.0239
	62.3176	65.8405	68.1052		30.1507	37.6884	44.9749
	32.98	2.43142	22.3815		64.2857	65.8195	65.8195
					51.0709	54.0251	49.5322
					60.6568	74.9071	80.3284
