# Supplementary figures and images for: Brain-specific Drp1 regulates postsynaptic endocytosis and dendrite formation independently of mitochondrial division
Source: eLife journal article supplement (doi:10.7554/elife.44739), 2019-10-11

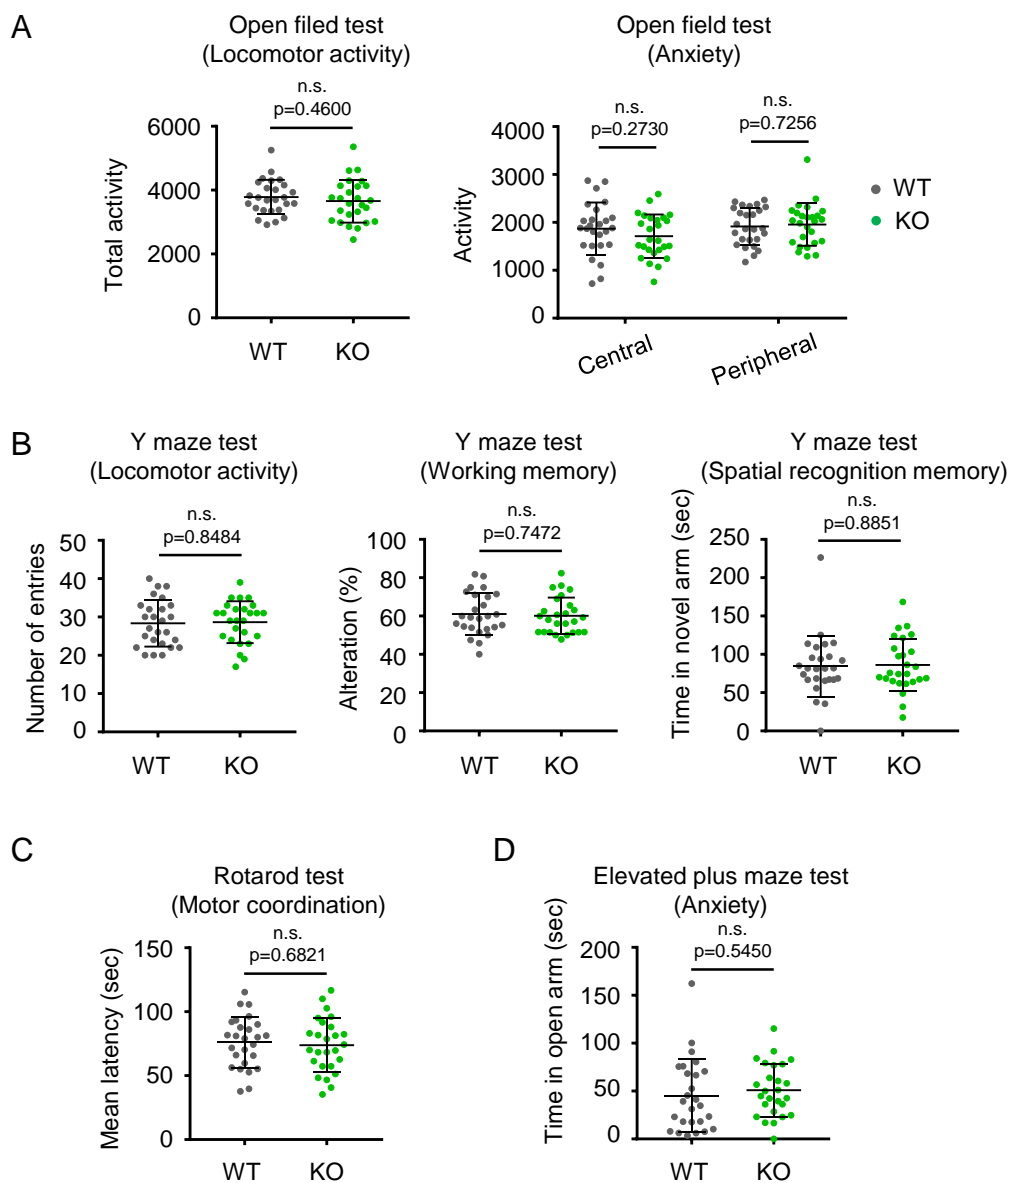

Figure 4 — figure supplement 3. Itoh *et al.*

Supplement: supp [file elife-44739-supp-v1.zip]

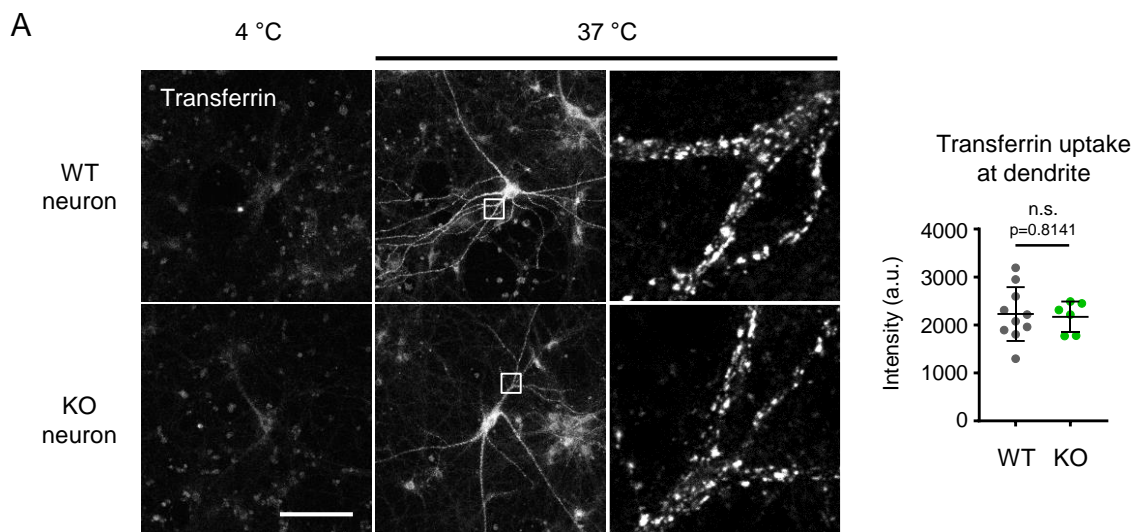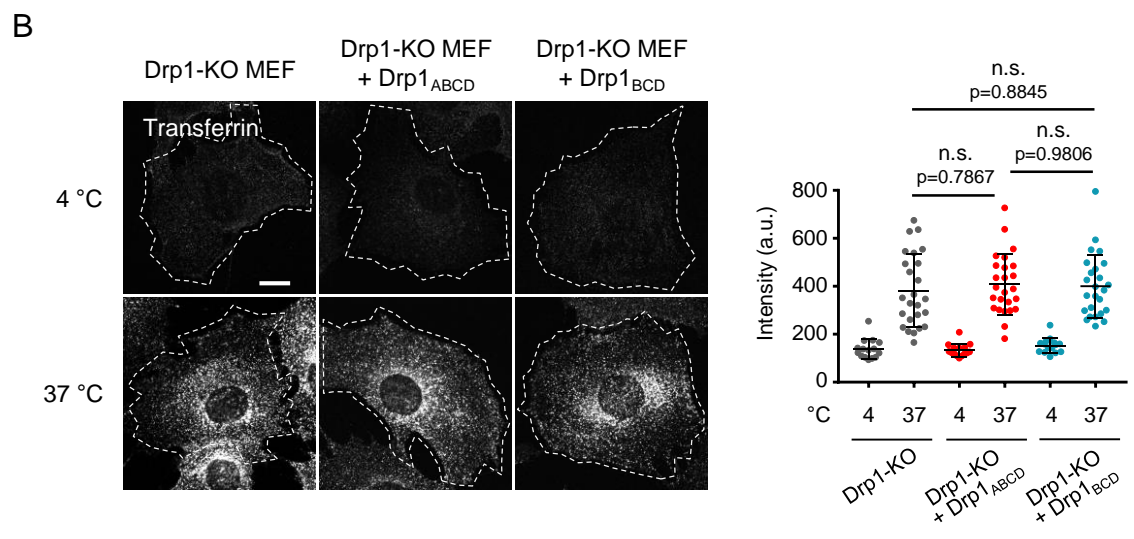

Figure 3 — figure supplement 1. Itoh *et al.*

Supplement: supp [file elife-44739-supp-v1.zip]

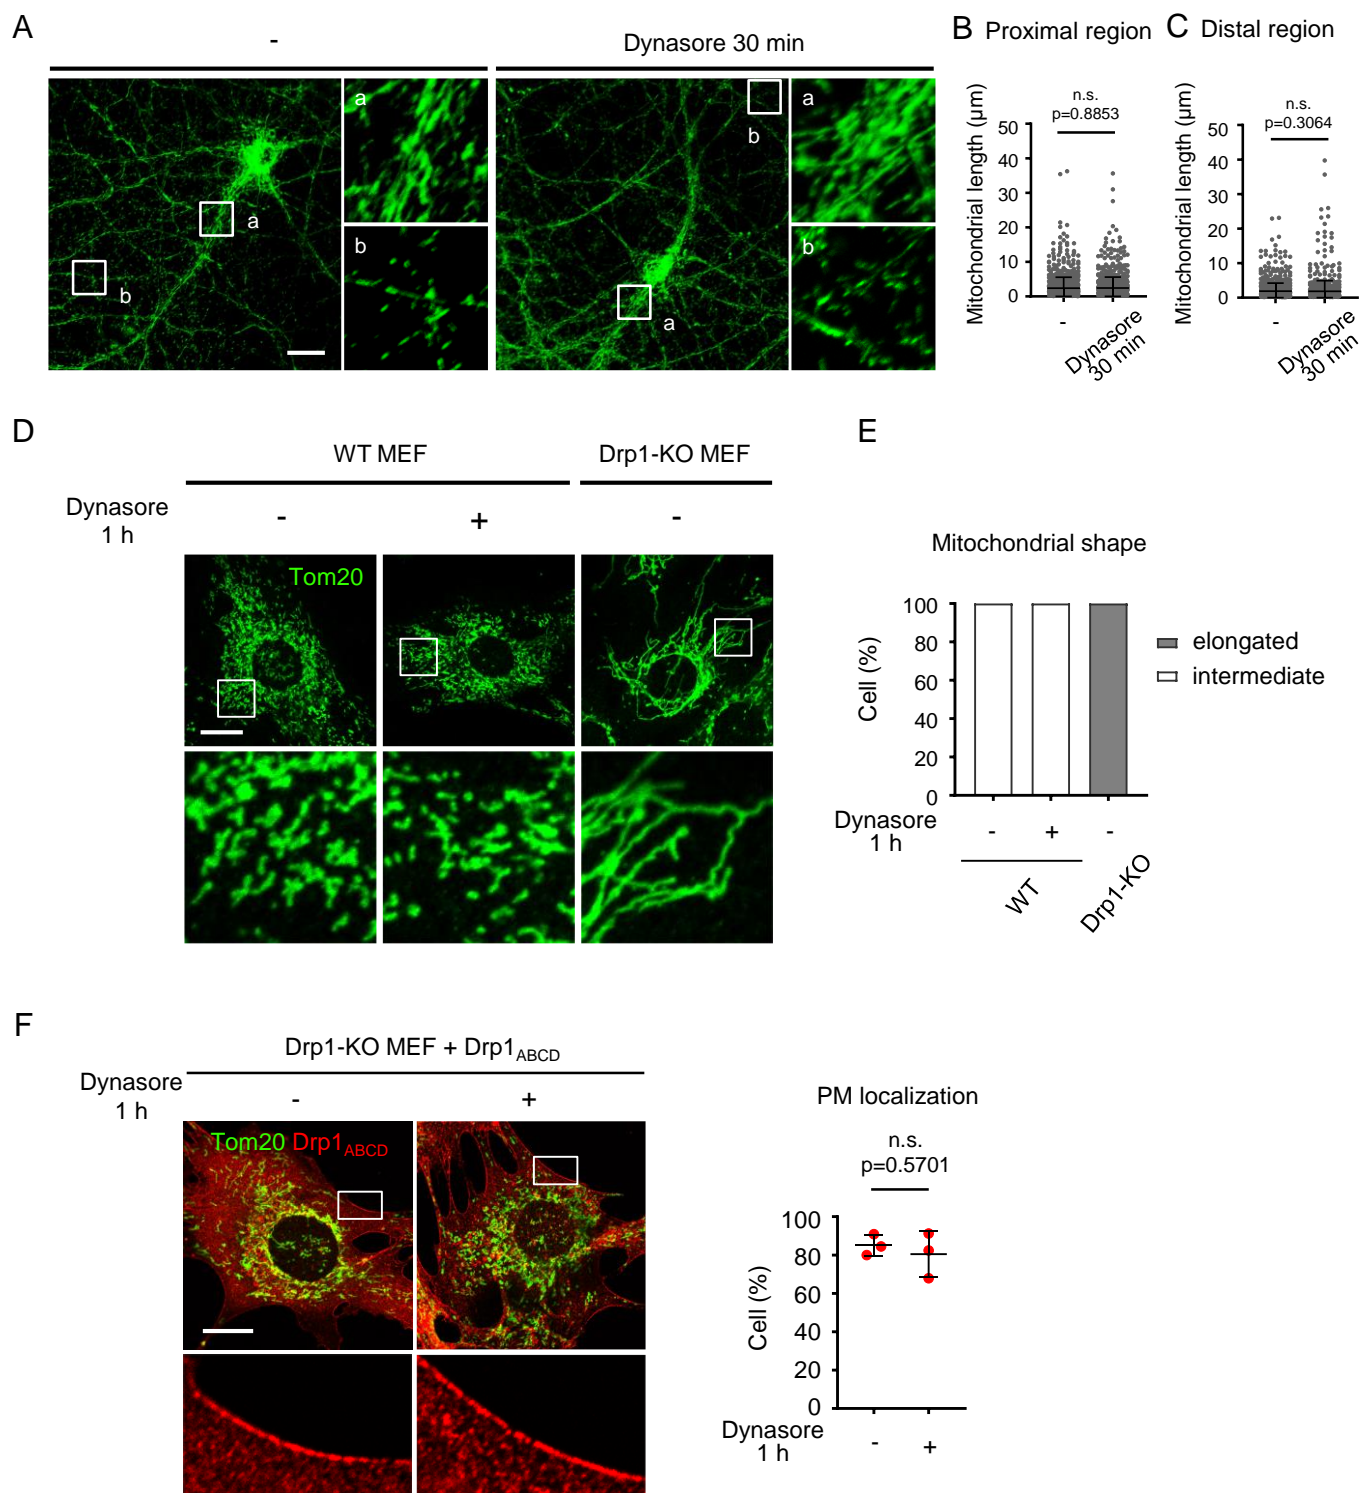

Figure 2 — figure supplement 1. Itoh *et al.*

Supplement: supp [file elife-44739-supp-v1.zip]

## A Hippocampus

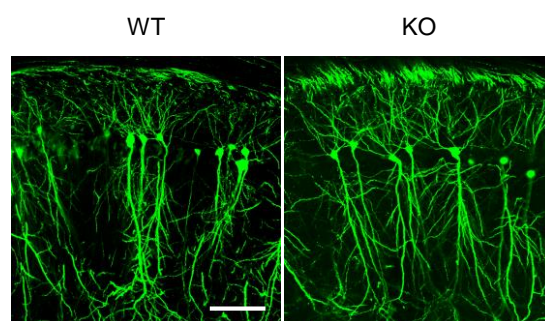

## B Cortex

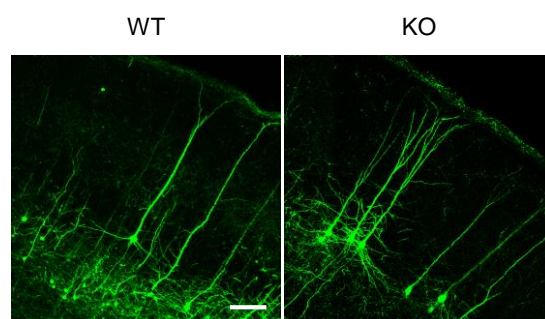

Supplement: supp [file elife-44739-supp-v1.zip]

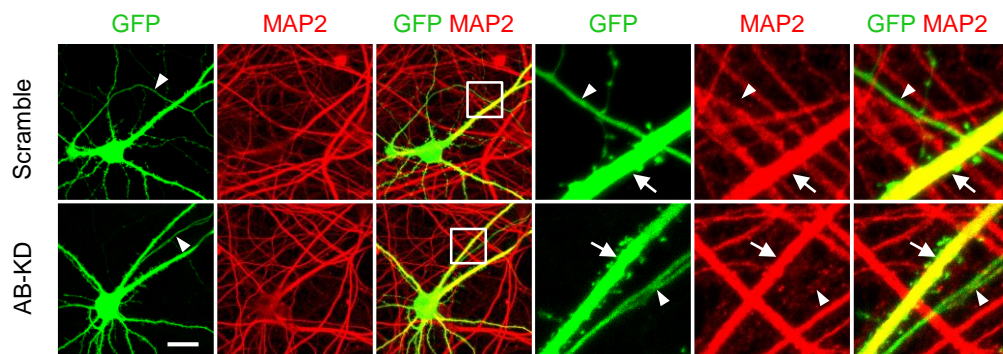

Figure 4 — figure supplement 1. Itoh *et al.*

Supplement: supp [file elife-44739-supp-v1.zip]
